# Supplementary material for: Age, multimorbidity and dementia with health care costs in older people in Alberta: a population-based retrospective cohort study
Source: PubMed Central journal article supplement — CMAJ Open. 2022 Jul 5;10(3):E577–88. doi: 10.9778/cmajo.20210035 (PMC9262346; doi:10.9778/cmajo.20210035), 2022-07-05
Supplement: open-2021-0035-1-at.pdf [file open-2021-0035-1-at.pdf]

**Table S1. Marginal annual mean costs (in CAD) for dementia by age and number of morbidities in participants ≥65 years**

| Morbidities        | Participant-years <sup>1</sup> | Hospital costs<br>Mean (95%CI) | Medication costs<br>Mean (95%CI) | ACCS costs<br>Mean (95%CI) | Claim costs<br>Mean (95%CI) | LTC costs<br>Mean (95%CI) | Total costs<br>Mean (95%CI) |
|--------------------|--------------------------------|--------------------------------|----------------------------------|----------------------------|-----------------------------|---------------------------|-----------------------------|
| <i>No dementia</i> |                                |                                |                                  |                            |                             |                           |                             |
| Age 65-74y         |                                |                                |                                  |                            |                             |                           |                             |
| None               | 604,675                        | 209 (194-224)                  | 187 (184-190)                    | 305 (301-308)              | 430 (425-435)               | 57 (46-67)                | 1,179 (1,155-1,203)         |
| One                | 716,368                        | 687 (664-710)                  | 583 (578-589)                    | 632 (625-638)              | 854 (847-861)               | 144 (129-158)             | 2,906 (2,870-2,943)         |
| Two                | 686,322                        | 1,375 (1,343-1,407)            | 946 (939-952)                    | 936 (928-944)              | 1,201 (1,193-1,208)         | 294 (273-314)             | 4,759 (4,711-4,807)         |
| Three              | 538,278                        | 2,326 (2,279-2,372)            | 1,367 (1,355-1,379)              | 1,304 (1,291-1,317)        | 1,583 (1,573-1,594)         | 554 (523-586)             | 7,143 (7,072-7,215)         |
| Four or more       | 761,930                        | 7,671 (7,579-7,763)            | 2,315 (2,300-2,330)              | 2,889 (2,857-2,920)        | 3,055 (3,034-3,077)         | 2,082 (2,023-2,142)       | 18,023 (17,877-18,169)      |
| Age 75-84y         |                                |                                |                                  |                            |                             |                           |                             |
| None               | 171,866                        | 289 (253-325)                  | 193 (186-199)                    | 277 (269-285)              | 385 (378-393)               | 167 (136-198)             | 1,291 (1,236-1,346)         |
| One                | 240,148                        | 962 (924-1,000)                | 659 (644-673)                    | 653 (643-662)              | 905 (895-915)               | 387 (348-425)             | 3,560 (3,494-3,627)         |
| Two                | 317,917                        | 1,775 (1,728-1,822)            | 1,009 (999-1,019)                | 957 (945-969)              | 1,276 (1,263-1,290)         | 730 (682-779)             | 5,743 (5,661-5,824)         |
| Three              | 324,095                        | 2,939 (2,850-3,029)            | 1,385 (1,374-1,397)              | 1,327 (1,308-1,346)        | 1,663 (1,649-1,678)         | 1,123 (1,067-1,179)       | 8,434 (8,309-8,559)         |
| Four or more       | 668,995                        | 9,498 (9,400-9,595)            | 2,231 (2,218-2,244)              | 2,881 (2,848-2,915)        | 3,211 (3,189-3,232)         | 3,591 (3,512-3,670)       | 21,404 (21,243-21,566)      |
| Age 85y+           |                                |                                |                                  |                            |                             |                           |                             |
| None               | 92,308                         | 175 (149-201)                  | 62 (56-67)                       | 83 (76-90)                 | 122 (115-129)               | 342 (280-405)             | 764 (688-840)               |
| One                | 50,571                         | 1,489 (1,385-1,593)            | 551 (530-573)                    | 553 (482-625)              | 742 (721-763)               | 2,115 (1,906-2,323)       | 5,477 (5,204-5,751)         |
| Two                | 78,979                         | 2,728 (2,603-2,854)            | 933 (912-954)                    | 829 (805-852)              | 1,163 (1,139-1,187)         | 3,012 (2,825-3,200)       | 8,703 (8,444-8,961)         |
| Three              | 94,132                         | 4,530 (4,375-4,685)            | 1,260 (1,238-1,281)              | 1,176 (1,144-1,209)        | 1,601 (1,572-1,631)         | 4,005 (3,810-4,199)       | 12,573 (12,285-12,861)      |
| Four or more       | 257,719                        | 12,513 (12,348-12,678)         | 2,004 (1,986-2,022)              | 2,501 (2,458-2,543)        | 3,164 (3,133-3,196)         | 8,998 (8,808-9,188)       | 29,139 (28,843-29,434)      |
| <i>Dementia</i>    |                                |                                |                                  |                            |                             |                           |                             |
| Age 65-74y         |                                |                                |                                  |                            |                             |                           |                             |
| None               | 2,454                          | 6,870 (5,207-8,533)            | 737 (668-806)                    | 972 (855-1,089)            | 1,637 (1,462-1,813)         | 18,461 (15,949-20,973)    | 28,777 (25,683-31,871)      |
| One                | 6,319                          | 9,881 (8,509-11,253)           | 964 (911-1,018)                  | 1,201 (1,108-1,293)        | 2,015 (1,901-2,130)         | 21,065 (19,519-22,611)    | 35,159 (33,026-37,293)      |
| Two                | 9,631                          | 12,650 (11,085-14,215)         | 1,180 (1,130-1,230)              | 1,433 (1,321-1,546)        | 2,570 (2,450-2,690)         | 21,898 (20,685-23,111)    | 39,627 (37,598-41,656)      |
| Three              | 11,706                         | 15,083 (14,091-16,076)         | 1,583 (1,522-1,644)              | 1,883 (1,753-2,014)        | 3,107 (3,000-3,214)         | 23,107 (22,028-24,187)    | 44,685 (43,129-46,241)      |
| Four or more       | 50,804                         | 28,333 (27,648-29,018)         | 2,570 (2,508-2,633)              | 4,118 (3,963-4,274)        | 5,837 (5,731-5,942)         | 31,701 (31,051-32,350)    | 72,195 (71,122-73,267)      |
| Age 75-84y         |                                |                                |                                  |                            |                             |                           |                             |
| None               | 3,868                          | 7,138 (6,006-8,269)            | 779 (717-841)                    | 790 (727-852)              | 1,539 (1,450-1,628)         | 25,320 (23,275-27,364)    | 35,942 (33,565-38,320)      |
| One                | 11,900                         | 9,273 (8,152-10,394)           | 1,014 (971-1,057)                | 1,007 (947-1,067)          | 1,919 (1,847-1,991)         | 27,838 (26,648-29,028)    | 41,527 (39,870-43,183)      |
| Two                | 21,781                         | 11,084 (10,519-11,648)         | 1,252 (1,216-1,289)              | 1,279 (1,221-1,337)        | 2,332 (2,272-2,391)         | 26,733 (25,894-27,571)    | 43,011 (41,972-44,050)      |
| Three              | 29,356                         | 14,103 (13,555-14,652)         | 1,498 (1,462-1,534)              | 1,548 (1,489-1,606)        | 2,829 (2,769-2,888)         | 28,445 (27,740-29,150)    | 48,637 (47,719-49,554)      |
| Four or more       | 132,665                        | 24,958 (24,612-25,304)         | 2,139 (2,113-2,164)              | 3,115 (3,045-3,184)        | 4,913 (4,859-4,966)         | 35,370 (34,980-35,759)    | 70,463 (69,902-71,023)      |
| Age 85y+           |                                |                                |                                  |                            |                             |                           |                             |
| None               | 3,384                          | 6,360 (5,355-7,365)            | 418 (368-468)                    | 548 (467-629)              | 1,492 (1,333-1,650)         | 36,757 (33,871-39,642)    | 46,608 (43,343-49,874)      |
| One                | 10,633                         | 8,575 (7,896-9,255)            | 678 (639-717)                    | 795 (749-842)              | 1,872 (1,802-1,943)         | 38,938 (37,497-40,379)    | 51,870 (50,252-53,489)      |
| Two                | 22,569                         | 10,610 (10,074-11,145)         | 892 (857-928)                    | 993 (948-1,037)            | 2,252 (2,182-2,322)         | 39,746 (38,806-40,685)    | 55,488 (54,385-56,590)      |
| Three              | 33,831                         | 13,026 (12,590-13,461)         | 1,026 (999-1,054)                | 1,237 (1,185-1,288)        | 2,712 (2,654-2,770)         | 41,707 (40,981-42,434)    | 60,550 (59,698-61,403)      |
| Four or more       | 151,031                        | 21,506 (21,233-21,779)         | 1,526 (1,506-1,545)              | 2,215 (2,173-2,256)        | 4,259 (4,218-4,300)         | 45,358 (44,998-45,718)    | 75,252 (74,794-75,709)      |

| Morbidities | Participant-years <sup>1</sup> | Hospital costs<br>Mean (95%CI) | Medication costs<br>Mean (95%CI) | ACCS costs<br>Mean (95%CI) | Claim costs<br>Mean (95%CI) | LTC costs<br>Mean (95%CI) | Total costs<br>Mean (95%CI) |
|-------------|--------------------------------|--------------------------------|----------------------------------|----------------------------|-----------------------------|---------------------------|-----------------------------|
|             |                                |                                |                                  |                            |                             |                           |                             |

ACCS Ambulatory Care Classification System, CAD Canadian dollars, CI confidence interval, LTC long-term care

Marginal mean annual costs are reported for fixed values of dementia, age and the number of morbidities. These models include 3-way and 2-way interactions terms for dementia, age, and number of morbidity. No LTC costs include hospitalizations, medications, ACCS and provider claims All costs are reported in \$1000 Canadian dollar units and are inflated to 2017 costs using the consumer price index for all items in Canada. Unshaded cells show significant increases in cost; shaded cells show significant decreases in cost and grey font shows non-significant differences.

<sup>1</sup>Participant-years correspond to number of full or partial fiscal-years for each participant

**Table S2. Marginal differences in mean annual costs in participants ≥65 years (in CAD)**

| Comparisons                                    | Hospital costs      | Medication costs | ACCS costs       | Claim costs         | LTC costs           | Total costs         | No LTC total costs  |
|------------------------------------------------|---------------------|------------------|------------------|---------------------|---------------------|---------------------|---------------------|
| Increases with dementia (referent no dementia) |                     |                  |                  |                     |                     |                     |                     |
| Age 65-74y                                     |                     |                  |                  |                     |                     |                     |                     |
| None                                           | 6661 (4998,8325)    | 550 (482,619)    | 667 (550,784)    | 18404 (15892,20916) | 18404 (15892,20916) | 27598 (24504,30692) | 8960 (7215,10706)   |
| One                                            | 9194 (7822,10566)   | 381 (327,435)    | 569 (476,662)    | 20922 (19376,22467) | 20922 (19376,22467) | 32253 (30120,34386) | 11263 (9792,12733)  |
| Two                                            | 11275 (9710,12841)  | 234 (184,285)    | 497 (385,610)    | 21605 (20392,22817) | 21605 (20392,22817) | 34868 (32839,36897) | 13340 (11682,14998) |
| Three                                          | 12758 (11764,13751) | 215 (154,277)    | 579 (448,710)    | 22553 (21474,23632) | 22553 (21474,23632) | 37542 (35985,39099) | 15115 (14007,16222) |
| Four or more                                   | 20662 (19972,21352) | 255 (191,319)    | 1230 (1074,1386) | 29618 (28969,30267) | 29618 (28969,30267) | 54171 (53096,55247) | 25028 (24199,25858) |
| Age 75-84y                                     |                     |                  |                  |                     |                     |                     |                     |
| None                                           | 6849 (5717,7981)    | 586 (524,649)    | 513 (449,576)    | 25153 (23109,27197) | 25153 (23109,27197) | 34652 (32274,37029) | 8979 (7794,10164)   |
| One                                            | 8310 (7189,9432)    | 355 (310,400)    | 354 (293,415)    | 27451 (26262,28641) | 27451 (26262,28641) | 37966 (36309,39623) | 9921 (8756,11085)   |
| Two                                            | 9308 (8742,9875)    | 243 (206,281)    | 322 (263,381)    | 26002 (25163,26841) | 26002 (25163,26841) | 37269 (36228,38309) | 10832 (10214,11451) |
| Three                                          | 11164 (10609,11719) | 113 (76,150)     | 221 (159,282)    | 27322 (26617,28028) | 27322 (26617,28028) | 40203 (39279,41127) | 12601 (11986,13216) |
| Four or more                                   | 15460 (15102,15819) | -93 (-121,-65)   | 233 (159,308)    | 31779 (31387,32171) | 31779 (31387,32171) | 49059 (48483,49634) | 17298 (16868,17728) |
| Age 85y+                                       |                     |                  |                  |                     |                     |                     |                     |
| None                                           | 6185 (5180,7190)    | 357 (306,407)    | 465 (384,546)    | 36414 (33530,39299) | 36414 (33530,39299) | 45844 (42579,49110) | 8130 (7019,9240)    |
| One                                            | 7087 (6399,7774)    | 127 (84,169)     | 242 (157,327)    | 36823 (35372,38275) | 36823 (35372,38275) | 46393 (44755,48031) | 8402 (7650,9155)    |
| Two                                            | 7881 (7331,8431)    | -41 (-82,-0)     | 164 (115,213)    | 36733 (35781,37686) | 36733 (35781,37686) | 46785 (45659,47911) | 8940 (8331,9549)    |
| Three                                          | 8496 (8034,8958)    | -233 (-268,-199) | 60 (0,120)       | 37703 (36957,38448) | 37703 (36957,38448) | 47977 (47086,48868) | 9290 (8759,9821)    |
| Four or more                                   | 8993 (8674,9312)    | -478 (-504,-453) | -286 (-343,-229) | 36360 (35966,36754) | 36360 (35966,36754) | 46113 (45583,46642) | 9236 (8853,9620)    |
| Increases with the number of morbidities       |                     |                  |                  |                     |                     |                     |                     |
| One vs None                                    |                     |                  |                  |                     |                     |                     |                     |
| No dementia                                    |                     |                  |                  |                     |                     |                     |                     |
| Age 65-74y                                     | 478 (451,506)       | 397 (390,403)    | 327 (320,334)    | 425 (416,433)       | 87 (71,103)         | 1727 (1684,1770)    | 1617 (1578,1656)    |
| Age 75-84y                                     | 673 (621,726)       | 466 (450,482)    | 376 (364,388)    | 519 (507,532)       | 220 (173,267)       | 2270 (2185,2354)    | 2015 (1946,2085)    |
| Age 85y+                                       | 1314 (1207,1421)    | 490 (468,512)    | 471 (399,542)    | 620 (598,642)       | 1772 (1560,1984)    | 4713 (4434,4993)    | 2836 (2677,2994)    |
| Dementia                                       |                     |                  |                  |                     |                     |                     |                     |
| Age 65-74y                                     | 3011 (854,5167)     | 227 (144,310)    | 229 (90,369)     | 378 (170,586)       | 2604 (-196,5404)    | 6383 (2774,9991)    | 3920 (1648,6192)    |
| Age 75-84y                                     | 2135 (544,3726)     | 235 (163,307)    | 217 (131,303)    | 380 (267,492)       | 2518 (261,4776)     | 5584 (2786,8382)    | 2957 (1300,4613)    |
| Age 85y+                                       | 2215 (1001,3430)    | 260 (201,319)    | 248 (158,337)    | 381 (208,553)       | 2181 (-972,5335)    | 5262 (1674,8849)    | 3108 (1777,4440)    |
| Two vs One                                     |                     |                  |                  |                     |                     |                     |                     |
| No dementia                                    |                     |                  |                  |                     |                     |                     |                     |
| Age 65-74y                                     | 688 (649,728)       | 362 (354,370)    | 304 (294,314)    | 346 (336,357)       | 150 (127,173)       | 1853 (1794,1912)    | 1697 (1645,1749)    |
| Age 75-84y                                     | 813 (753,873)       | 350 (334,367)    | 304 (289,319)    | 372 (355,388)       | 344 (288,400)       | 2182 (2081,2283)    | 1839 (1759,1919)    |
| Age 85y+                                       | 1239 (1077,1402)    | 381 (353,410)    | 275 (201,350)    | 421 (390,452)       | 897 (638,1157)      | 3225 (2868,3583)    | 2296 (2081,2511)    |

| Comparisons         | Hospital costs      | Medication costs | ACCS costs       | Claim costs      | LTC costs         | Total costs         | No LTC total costs  |
|---------------------|---------------------|------------------|------------------|------------------|-------------------|---------------------|---------------------|
| Dementia            |                     |                  |                  |                  |                   |                     |                     |
| Age 65-74y          | 2770 (679,4860)     | 216 (146,285)    | 232 (88,376)     | 555 (393,717)    | 833 (-981,2647)   | 4468 (1640,7295)    | 3774 (1557,5991)    |
| Age 75-84y          | 1811 (554,3068)     | 238 (185,292)    | 272 (189,355)    | 413 (321,505)    | -1106 (-2468,257) | 1485 (-396,3366)    | 2750 (1435,4066)    |
| Age 85y+            | 2034 (1167,2902)    | 214 (164,264)    | 197 (134,261)    | 380 (282,478)    | 807 (-839,2454)   | 3617 (1727,5508)    | 2834 (1889,3778)    |
| Three vs Two        |                     |                  |                  |                  |                   |                     |                     |
| No dementia         |                     |                  |                  |                  |                   |                     |                     |
| Age 65-74y          | 951 (895,1007)      | 422 (409,435)    | 369 (354,383)    | 383 (370,395)    | 261 (227,294)     | 2384 (2301,2467)    | 2121 (2048,2194)    |
| Age 75-84y          | 1164 (1064,1265)    | 376 (363,390)    | 370 (349,392)    | 387 (368,406)    | 392 (325,460)     | 2691 (2547,2835)    | 2297 (2175,2418)    |
| Age 85y+            | 1801 (1603,2000)    | 327 (298,355)    | 348 (310,385)    | 438 (401,476)    | 993 (745,1240)    | 3870 (3503,4237)    | 2905 (2663,3148)    |
| Dementia            |                     |                  |                  |                  |                   |                     |                     |
| Age 65-74y          | 2433 (585,4281)     | 403 (331,474)    | 450 (279,621)    | 537 (380,693)    | 1209 (-255,2673)  | 5058 (2627,7490)    | 3896 (1913,5878)    |
| Age 75-84y          | 3020 (2233,3806)    | 246 (198,294)    | 269 (191,346)    | 497 (415,580)    | 1713 (703,2722)   | 5626 (4319,6932)    | 4066 (3206,4925)    |
| Age 85y+            | 2416 (1725,3107)    | 134 (92,176)     | 244 (177,311)    | 459 (370,549)    | 1962 (850,3074)   | 5062 (3738,6387)    | 3256 (2488,4024)    |
| Four+ vs Three      |                     |                  |                  |                  |                   |                     |                     |
| No dementia         |                     |                  |                  |                  |                   |                     |                     |
| Age 65-74y          | 5345 (5243,5447)    | 948 (930,966)    | 1584 (1552,1617) | 1472 (1448,1496) | 1528 (1465,1591)  | 10880 (10721,11039) | 9370 (9232,9508)    |
| Age 75-84y          | 6558 (6427,6690)    | 846 (830,862)    | 1554 (1517,1591) | 1547 (1521,1573) | 2468 (2377,2559)  | 12970 (12771,13169) | 10511 (10344,10677) |
| Age 85y+            | 7983 (7758,8209)    | 745 (718,771)    | 1324 (1272,1376) | 1563 (1520,1606) | 4993 (4736,5251)  | 16566 (16166,16966) | 11615 (11333,11896) |
| Dementia            |                     |                  |                  |                  |                   |                     |                     |
| Age 65-74y          | 13250 (12053,14447) | 988 (903,1072)   | 2235 (2040,2430) | 2730 (2583,2877) | 8593 (7395,9791)  | 27510 (25683,29336) | 19284 (17918,20649) |
| Age 75-84y          | 10855 (10208,11501) | 641 (598,683)    | 1567 (1478,1657) | 2084 (2005,2163) | 6925 (6154,7696)  | 21826 (20785,22867) | 15208 (14478,15938) |
| Age 85y+            | 8481 (7969,8993)    | 500 (467,532)    | 978 (912,1044)   | 1548 (1477,1618) | 3651 (2872,4429)  | 14701 (13770,15633) | 11561 (10972,12149) |
| Increases with age  |                     |                  |                  |                  |                   |                     |                     |
| Age75-84y vs 65-74y |                     |                  |                  |                  |                   |                     |                     |
| No dementia         |                     |                  |                  |                  |                   |                     |                     |
| None                | 80 (41,119)         | 6 (-1,13)        | -28 (-36,-19)    | -44 (-53,-35)    | 110 (79,141)      | 112 (53,170)        | 19 (-33,70)         |
| One                 | 276 (231,320)       | 76 (61,90)       | 21 (10,32)       | 50 (39,62)       | 243 (204,282)     | 654 (580,728)       | 417 (356,477)       |
| Two                 | 400 (343,457)       | 64 (52,75)       | 21 (7,35)        | 75 (60,91)       | 437 (387,487)     | 983 (891,1076)      | 559 (485,633)       |
| Three               | 614 (513,714)       | 18 (2,34)        | 23 (0,46)        | 80 (62,98)       | 569 (508,629)     | 1290 (1149,1432)    | 735 (613,857)       |
| Four or more        | 1827 (1695,1959)    | -84 (-102,-66)   | -7 (-50,35)      | 155 (125,185)    | 1509 (1418,1599)  | 3381 (3174,3589)    | 1875 (1700,2051)    |
| Dementia            |                     |                  |                  |                  |                   |                     |                     |
| None                | 267 (-1737,2272)    | 42 (-48,132)     | -182 (-312,-52)  | -99 (-293,96)    | 6859 (3814,9904)  | 7166 (3445,10887)   | 38 (-2059,2135)     |
| One                 | -608 (-2374,1158)   | 50 (-17,117)     | -194 (-303,-85)  | -97 (-230,36)    | 6773 (4946,8599)  | 6367 (3763,8971)    | -925 (-2790,940)    |
| Two                 | -1567 (-3228,95)    | 72 (12,133)      | -154 (-280,-28)  | -239 (-371,-106) | 4834 (3426,6243)  | 3384 (1156,5612)    | -1949 (-3713,-184)  |

Appendix 1, as supplied by the author. Appendix to: Tonelli M, Wiebe N, Joannette Y, et al. Age, multimorbidity and dementia with health care costs in older Albertan people: a population-based retrospective cohort study. *CMAJ Open* 2022. DOI: 10.9778/cmajo.2021003500289. Copyright © 2022 The Author(s) or their employer(s). To receive this resource in an accessible format, please contact us at [cmajgroup@cmaj.ca](mailto:cmajgroup@cmaj.ca).

| Comparisons        | Hospital costs      | Medication costs | ACCS costs         | Claim costs       | LTC costs           | Total costs         | No LTC total costs  |
|--------------------|---------------------|------------------|--------------------|-------------------|---------------------|---------------------|---------------------|
| Three              | -980 (-2111,151)    | -84 (-153,-15)   | -336 (-478,-193)   | -278 (-399,-157)  | 5338 (4105,6570)    | 3952 (2192,5711)    | -1779 (-3036,-522)  |
| Four or more       | -3375 (-4134,-2616) | -432 (-494,-369) | -1004 (-1168,-839) | -924 (-1041,-808) | 3669 (2957,4382)    | -1732 (-2900,-564)  | -5855 (-6762,-4947) |
| Age 85y+ vs 75-84y |                     |                  |                    |                   |                     |                     |                     |
| No dementia        |                     |                  |                    |                   |                     |                     |                     |
| None               | -114 (-159,-70)     | -131 (-139,-123) | -194 (-204,-183)   | -264 (-274,-253)  | 176 (108,243)       | -527 (-618,-435)    | -679 (-740,-618)    |
| One                | 527 (416,637)       | -107 (-132,-83)  | -99 (-171,-28)     | -163 (-185,-141)  | 1728 (1522,1934)    | 1917 (1642,2193)    | 142 (-19,302)       |
| Two                | 953 (820,1087)      | -76 (-98,-54)    | -128 (-153,-103)   | -113 (-140,-87)   | 2282 (2094,2469)    | 2960 (2696,3225)    | 599 (436,762)       |
| Three              | 1590 (1413,1768)    | -126 (-149,-102) | -151 (-187,-114)   | -62 (-95,-29)     | 2882 (2686,3078)    | 4139 (3832,4446)    | 1208 (991,1424)     |
| Four or more       | 3015 (2826,3205)    | -227 (-248,-207) | -381 (-431,-331)   | -46 (-83,-9)      | 5407 (5214,5601)    | 7734 (7412,8057)    | 2311 (2070,2553)    |
| Dementia           |                     |                  |                    |                   |                     |                     |                     |
| None               | -777 (-2283,728)    | -361 (-437,-284) | -242 (-343,-140)   | -47 (-226,132)    | 11437 (8068,14807)  | 10666 (6804,14528)  | -1528 (-3139,82)    |
| One                | -697 (-2005,611)    | -336 (-391,-281) | -212 (-287,-136)   | -46 (-145,53)     | 11100 (9345,12856)  | 10344 (8128,12560)  | -1377 (-2748,-6)    |
| Two                | -474 (-1250,302)    | -360 (-410,-311) | -286 (-359,-214)   | -79 (-170,12)     | 13013 (11824,14202) | 12477 (11028,13925) | -1293 (-2141,-446)  |
| Three              | -1078 (-1774,-381)  | -472 (-516,-428) | -311 (-388,-234)   | -117 (-199,-35)   | 13262 (12302,14223) | 11913 (10714,13113) | -2103 (-2880,-1326) |
| Four or more       | -3452 (-3886,-3018) | -613 (-644,-582) | -900 (-978,-822)   | -654 (-720,-587)  | 9988 (9493,10484)   | 4789 (4099,5479)    | -5751 (-6264,-5237) |

ACCS Ambulatory Care Classification System, CAD Canadian dollars, CI confidence interval, LTC long-term care

Marginal differences in mean annual costs (in CAD) are reported: for dementia vs no dementia by age and number of morbidities categories; for increases in the number of morbidities by dementia and age categories and; for increases in age category by dementia and number of morbidities categories. These models include 3-way and 2-way interactions terms for dementia, age, and number of morbidity. No LTC costs include hospitalizations, medications, ACCS and provider claims All costs are reported in \$1000 Canadian dollar units and are inflated to 2017 costs using the consumer price index for all items in Canada. Unshaded cells show significant increases in cost; shaded cells show significant decreases in cost and grey font shows non-significant differences.

**Table S3. Marginal annual mean costs (in CAD) for dementia by age and number of morbidities in participants ≥85 years**

| Morbidities        | Participant-years <sup>1</sup> | Hospital costs<br>Mean (95%CI) | Medication costs<br>Mean (95%CI) | ACCS costs<br>Mean (95%CI) | Claim costs<br>Mean (95%CI) | LTC costs<br>Mean (95%CI) | Total costs<br>Mean (95%CI) |
|--------------------|--------------------------------|--------------------------------|----------------------------------|----------------------------|-----------------------------|---------------------------|-----------------------------|
| <i>No dementia</i> |                                |                                |                                  |                            |                             |                           |                             |
| Age 85-89y         |                                |                                |                                  |                            |                             |                           |                             |
| None               | 37,235                         | 245 (202-288)                  | 115 (104-125)                    | 144 (130-157)              | 232 (217-248)               | 436 (342-530)             | 1,132 (1,015-1,248)         |
| One                | 34,388                         | 1,372 (1,256-1,488)            | 619 (595-643)                    | 567 (541-593)              | 820 (797-843)               | 1,588 (1,393-1,783)       | 4,960 (4,707-5,214)         |
| Two                | 55,091                         | 2,442 (2,302-2,582)            | 991 (968-1,015)                  | 875 (845-904)              | 1,224 (1,195-1,252)         | 2,106 (1,941-2,272)       | 7,660 (7,408-7,912)         |
| Three              | 65,043                         | 3,941 (3,778-4,104)            | 1,319 (1,295-1,344)              | 1,207 (1,169-1,245)        | 1,632 (1,597-1,667)         | 2,806 (2,634-2,978)       | 10,964 (10,677-11,251)      |
| Four or more       | 175,418                        | 11,490 (11,298-11,682)         | 2,103 (2,083-2,123)              | 2,572 (2,524-2,620)        | 3,182 (3,144-3,220)         | 7,267 (7,082-7,451)       | 26,946 (26,608-27,284)      |
| Age 90-94y         |                                |                                |                                  |                            |                             |                           |                             |
| None               | 24,420                         | 174 (119-229)                  | 50 (42-58)                       | 70 (55-85)                 | 107 (94-120)                | 401 (289-513)             | 745 (615-874)               |
| One                | 11,744                         | 1,583 (1,375-1,791)            | 505 (462-547)                    | 592 (289-894)              | 669 (625-713)               | 2,794 (2,393-3,196)       | 6,087 (5,497-6,676)         |
| Two                | 18,613                         | 3,055 (2,796-3,314)            | 895 (854-936)                    | 733 (699-768)              | 1,097 (1,059-1,134)         | 4,398 (3,991-4,805)       | 10,132 (9,601-10,663)       |
| Three              | 23,005                         | 5,235 (4,878-5,591)            | 1,211 (1,174-1,248)              | 1,098 (1,048-1,149)        | 1,565 (1,519-1,611)         | 5,833 (5,423-6,244)       | 14,913 (14,305-15,520)      |
| Four or more       | 66,191                         | 13,705 (13,388-14,022)         | 1,922 (1,893-1,952)              | 2,268 (2,205-2,332)        | 3,118 (3,067-3,169)         | 11,910 (11,554-12,266)    | 32,998 (32,448-33,547)      |
| Age 95y+           |                                |                                |                                  |                            |                             |                           |                             |
| None               | 30,653                         | 70 (38-101)                    | 9 (7-11)                         | 13 (10-17)                 | 26 (20-32)                  | 233 (144-323)             | 325 (228-422)               |
| One                | 4,439                          | 1,678 (1,249-2,107)            | 243 (210-276)                    | 280 (234-326)              | 437 (379-494)               | 5,203 (4,122-6,284)       | 7,695 (6,453-8,937)         |
| Two                | 5,275                          | 3,566 (3,000-4,132)            | 587 (539-634)                    | 567 (495-640)              | 894 (823-965)               | 8,783 (7,638-9,929)       | 14,276 (12,890-15,662)      |
| Three              | 6,084                          | 6,530 (5,800-7,259)            | 954 (875-1,034)                  | 940 (851-1,028)            | 1,523 (1,397-1,650)         | 11,558 (10,342-12,773)    | 21,107 (19,573-22,640)      |
| Four or more       | 16,110                         | 14,815 (14,109-15,521)         | 1,561 (1,503-1,620)              | 2,024 (1,905-2,142)        | 3,037 (2,917-3,157)         | 19,913 (18,972-20,853)    | 40,973 (39,684-42,262)      |
| <i>Dementia</i>    |                                |                                |                                  |                            |                             |                           |                             |
| Age 85-89y         |                                |                                |                                  |                            |                             |                           |                             |
| None               | 1,668                          | 7,089 (5,660-8,518)            | 547 (478-616)                    | 709 (570-849)              | 1,774 (1,527-2,020)         | 35,701 (32,722-38,681)    | 45,673 (42,388-48,958)      |
| One                | 5,737                          | 8,795 (7,925-9,665)            | 854 (803-905)                    | 893 (825-960)              | 1,980 (1,890-2,070)         | 35,399 (33,812-36,987)    | 48,187 (46,367-50,008)      |
| Two                | 11,867                         | 11,227 (10,407-12,047)         | 1,105 (1,051-1,159)              | 1,108 (1,043-1,174)        | 2,352 (2,249-2,455)         | 36,147 (35,054-37,240)    | 52,027 (50,677-53,377)      |
| Three              | 17,522                         | 13,216 (12,633-13,800)         | 1,209 (1,173-1,245)              | 1,324 (1,259-1,389)        | 2,765 (2,695-2,835)         | 37,307 (36,441-38,172)    | 55,967 (54,923-57,012)      |
| Four or more       | 82,467                         | 22,401 (22,030-22,772)         | 1,772 (1,746-1,798)              | 2,418 (2,359-2,476)        | 4,430 (4,376-4,483)         | 42,032 (41,598-42,465)    | 73,577 (72,961-74,193)      |
| Age 90-94y         |                                |                                |                                  |                            |                             |                           |                             |
| None               | 1,029                          | 6,087 (4,339-7,835)            | 416 (335-497)                    | 480 (388-572)              | 1,508 (1,322-1,693)         | 41,078 (37,035-45,122)    | 49,840 (45,385-54,296)      |
| One                | 3,327                          | 8,507 (7,529-9,485)            | 624 (561-688)                    | 763 (695-832)              | 1,970 (1,853-2,086)         | 43,560 (41,468-45,652)    | 55,474 (53,259-57,689)      |
| Two                | 7,349                          | 10,355 (9,618-11,093)          | 803 (757-850)                    | 928 (865-992)              | 2,278 (2,186-2,370)         | 43,111 (41,725-44,496)    | 57,467 (55,914-59,020)      |
| Three              | 11,313                         | 13,175 (12,439-13,911)         | 994 (948-1,039)                  | 1,218 (1,117-1,319)        | 2,819 (2,707-2,930)         | 44,838 (43,750-45,926)    | 62,983 (61,678-64,288)      |
| Four or more       | 50,298                         | 20,762 (20,330-21,194)         | 1,413 (1,383-1,442)              | 2,046 (1,986-2,106)        | 4,211 (4,146-4,276)         | 48,838 (48,307-49,369)    | 77,193 (76,511-77,875)      |
| Age 95y+           |                                |                                |                                  |                            |                             |                           |                             |
| None               | 687                            | 4,164 (2,467-5,861)            | 171 (93-248)                     | 247 (178-316)              | 913 (713-1,112)             | 35,585 (28,621-42,549)    | 40,912 (33,216-48,608)      |
| One                | 1,569                          | 6,619 (4,374-8,864)            | 267 (218-315)                    | 504 (418-590)              | 1,489 (1,330-1,648)         | 45,653 (41,400-49,905)    | 54,549 (49,531-59,568)      |
| Two                | 3,353                          | 7,424 (6,443-8,406)            | 471 (414-527)                    | 745 (632-859)              | 2,132 (1,970-2,293)         | 48,414 (45,811-51,017)    | 58,855 (55,924-61,786)      |
| Three              | 4,996                          | 10,205 (9,204-11,207)          | 605 (549-660)                    | 969 (851-1,087)            | 2,595 (2,437-2,752)         | 53,614 (51,730-55,498)    | 67,412 (65,244-69,580)      |
| Four or more       | 18,266                         | 16,364 (15,695-17,034)         | 962 (920-1,003)                  | 1,601 (1,519-1,684)        | 3,848 (3,718-3,979)         | 55,963 (55,031-56,894)    | 77,950 (76,762-79,137)      |

Appendix 1, as supplied by the author. Appendix to: Tonelli M, Wiebe N, Joannette Y, et al. Age, multimorbidity and dementia with health care costs in older Albertan people: a population-based retrospective cohort study. *CMAJ Open* 2022. DOI: 10.9778/cmajo.2021003500289. Copyright © 2022 The Author(s) or their employer(s). To receive this resource in an accessible format, please contact us at [cmajgroup@cmaj.ca](mailto:cmajgroup@cmaj.ca).

| Morbidities | Participant-years <sup>1</sup> | Hospital costs<br>Mean (95%CI) | Medication costs<br>Mean (95%CI) | ACCS costs<br>Mean (95%CI) | Claim costs<br>Mean (95%CI) | LTC costs<br>Mean (95%CI) | Total costs<br>Mean (95%CI) |
|-------------|--------------------------------|--------------------------------|----------------------------------|----------------------------|-----------------------------|---------------------------|-----------------------------|
|             |                                |                                |                                  |                            |                             |                           |                             |

ACCS Ambulatory Care Classification System, CAD Canadian dollars, CI confidence interval, LTC long-term care

Marginal mean annual costs are reported for fixed values of dementia, age and the number of morbidities. These models include 3-way and 2-way interactions terms for dementia, age, and number of morbidity. No LTC costs include hospitalizations, medications, ACCS and provider claims All costs are reported in \$1000 Canadian dollar units and are inflated to 2017 costs using the consumer price index for all items in Canada. Unshaded cells show significant increases in cost; shaded cells show significant decreases in cost and grey font shows non-significant differences.

<sup>1</sup>Participant-years correspond to number of full or partial fiscal-years for each participant

**Table S4. Marginal differences in mean annual costs in participants ≥85 years (in CAD)**

| Comparisons                                    | Hospital costs      | Medication costs | ACCS costs       | Claim costs      | LTC costs           | Total costs         | No LTC total costs  |
|------------------------------------------------|---------------------|------------------|------------------|------------------|---------------------|---------------------|---------------------|
| Increases with dementia (referent no dementia) |                     |                  |                  |                  |                     |                     |                     |
| Age 85-89y                                     |                     |                  |                  |                  |                     |                     |                     |
| None                                           | 6844 (5415,8274)    | 433 (363,503)    | 566 (426,706)    | 1541 (1294,1788) | 35266 (32286,38245) | 44541 (41255,47828) | 9179 (7602,10756)   |
| One                                            | 7423 (6545,8301)    | 235 (180,290)    | 326 (255,396)    | 1160 (1067,1253) | 33811 (32214,35409) | 43227 (41391,45063) | 9035 (8076,9994)    |
| Two                                            | 8785 (7953,9617)    | 113 (56,171)     | 234 (163,304)    | 1128 (1021,1235) | 34041 (32938,35144) | 44368 (42997,45738) | 10257 (9328,11185)  |
| Three                                          | 9276 (8670,9881)    | -110 (-154,-67)  | 117 (42,192)     | 1133 (1055,1210) | 34501 (33622,35379) | 45003 (43925,46081) | 10379 (9691,11067)  |
| Four or more                                   | 10911 (10492,11330) | -331 (-363,-299) | -154 (-229,-80)  | 1248 (1182,1313) | 34765 (34302,35227) | 46632 (45957,47306) | 11616 (11117,12115) |
| Age 90-94y                                     |                     |                  |                  |                  |                     |                     |                     |
| None                                           | 5913 (4165,7662)    | 366 (285,447)    | 410 (317,503)    | 1400 (1214,1586) | 40677 (36634,44720) | 49096 (44640,53551) | 7882 (5970,9794)    |
| One                                            | 6924 (5924,7924)    | 120 (45,195)     | 172 (-139,482)   | 1300 (1176,1425) | 40766 (38643,42888) | 49387 (47101,51673) | 8386 (7205,9566)    |
| Two                                            | 7301 (6519,8082)    | -92 (-153,-30)   | 195 (123,267)    | 1181 (1082,1281) | 38713 (37276,40150) | 47335 (45701,48968) | 8505 (7620,9389)    |
| Three                                          | 7940 (7121,8759)    | -217 (-275,-160) | 120 (8,233)      | 1254 (1133,1374) | 39005 (37852,40158) | 48070 (46639,49501) | 9094 (8132,10057)   |
| Four or more                                   | 7057 (6518,7596)    | -510 (-550,-469) | -222 (-307,-138) | 1093 (1010,1175) | 36928 (36304,37552) | 44195 (43333,45058) | 7411 (6770,8052)    |
| Age 95y+                                       |                     |                  |                  |                  |                     |                     |                     |
| None                                           | 4094 (2396,5792)    | 162 (85,239)     | 234 (165,303)    | 886 (687,1086)   | 35352 (28387,42316) | 40587 (32891,48283) | 5277 (3430,7124)    |
| One                                            | 4941 (2659,7223)    | 24 (-34,82)      | 224 (127,321)    | 1052 (884,1221)  | 40449 (36071,44828) | 46854 (41693,52015) | 5979 (3560,8398)    |
| Two                                            | 3858 (2725,4991)    | -116 (-189,-43)  | 178 (44,312)     | 1238 (1062,1414) | 39631 (36811,42451) | 44579 (41358,47800) | 5080 (3780,6381)    |
| Three                                          | 3676 (2428,4923)    | -350 (-445,-254) | 29 (-95,153)     | 1071 (869,1273)  | 42057 (39840,44273) | 46305 (43677,48934) | 4365 (2889,5840)    |
| Four or more                                   | 1549 (572,2526)     | -600 (-671,-529) | -422 (-565,-279) | 812 (635,988)    | 36050 (34761,37339) | 36977 (35248,38705) | 1359 (163,2555)     |
| Increases with the number of morbidities       |                     |                  |                  |                  |                     |                     |                     |
| One vs None                                    |                     |                  |                  |                  |                     |                     |                     |
| No dementia                                    |                     |                  |                  |                  |                     |                     |                     |
| Age 85-89y                                     | 1127 (1003,1251)    | 504 (478,530)    | 423 (395,452)    | 588 (560,615)    | 1152 (942,1362)     | 3829 (3555,4102)    | 2548 (2383,2712)    |
| Age 90-94y                                     | 1409 (1194,1624)    | 455 (411,498)    | 522 (218,825)    | 562 (516,607)    | 2393 (1984,2802)    | 5342 (4745,5940)    | 2858 (2408,3307)    |
| Age 95y+                                       | 1608 (1178,2038)    | 234 (201,267)    | 267 (221,313)    | 411 (353,468)    | 4970 (3890,6050)    | 7370 (6129,8612)    | 2590 (2057,3124)    |
| Dementia                                       |                     |                  |                  |                  |                     |                     |                     |
| Age 85-89y                                     | 1706 (31,3380)      | 307 (225,388)    | 183 (36,330)     | 206 (-56,468)    | -302 (-3584,2980)   | 2514 (-1166,6195)   | 2403 (566,4241)     |
| Age 90-94y                                     | 2420 (416,4423)     | 209 (108,309)    | 283 (169,398)    | 462 (245,679)    | 2482 (-1971,6934)   | 5633 (740,10526)    | 3361 (1163,5560)    |
| Age 95y+                                       | 2455 (-358,5268)    | 96 (5,187)       | 257 (148,366)    | 576 (322,831)    | 10067 (1979,18156)  | 13637 (4508,22766)  | 3292 (296,6287)     |
| Two vs One                                     |                     |                  |                  |                  |                     |                     |                     |
| No dementia                                    |                     |                  |                  |                  |                     |                     |                     |
| Age 85-89y                                     | 1070 (888,1251)     | 372 (340,405)    | 308 (270,346)    | 404 (368,440)    | 518 (276,760)       | 2699 (2355,3044)    | 2145 (1918,2372)    |
| Age 90-94y                                     | 1472 (1140,1804)    | 391 (333,448)    | 142 (-163,447)   | 428 (370,485)    | 1604 (1062,2145)    | 4045 (3276,4815)    | 2382 (1845,2919)    |
| Age 95y+                                       | 1889 (1187,2590)    | 344 (288,400)    | 287 (202,373)    | 457 (367,547)    | 3580 (2072,5088)    | 6581 (4778,8383)    | 2780 (1955,3606)    |

Appendix 1, as supplied by the author. Appendix to: Tonelli M, Wiebe N, Joannette Y, et al. Age, multimorbidity and dementia with health care costs in older Albertan people: a population-based retrospective cohort study. *CMAJ Open* 2022. DOI: 10.9778/cmajo.2021003500289. Copyright © 2022 The Author(s) or their employer(s). To receive this resource in an accessible format, please contact us at [cmajgroup@cmaj.ca](mailto:cmajgroup@cmaj.ca).



| Comparisons          | Hospital costs     | Medication costs | ACCS costs       | Claim costs      | LTC costs         | Total costs         | No LTC total costs  |
|----------------------|--------------------|------------------|------------------|------------------|-------------------|---------------------|---------------------|
| Dementia             |                    |                  |                  |                  |                   |                     |                     |
| Age 85-89y           | 2432 (1230,3633)   | 251 (180,322)    | 216 (122,309)    | 372 (237,508)    | 748 (-1095,2591)  | 3840 (1641,6039)    | 3367 (2047,4687)    |
| Age 90-94y           | 1848 (616,3081)    | 179 (103,255)    | 165 (72,258)     | 308 (161,456)    | -449 (-2875,1976) | 1993 (-632,4619)    | 2501 (1121,3881)    |
| Age 95y+             | 805 (-1653,3263)   | 204 (132,276)    | 241 (101,382)    | 643 (417,868)    | 2762 (-2145,7668) | 4306 (-1423,10035)  | 1882 (-733,4497)    |
| Three vs Two         |                    |                  |                  |                  |                   |                     |                     |
| No dementia          |                    |                  |                  |                  |                   |                     |                     |
| Age 85-89y           | 1499 (1285,1713)   | 328 (296,360)    | 332 (288,377)    | 409 (364,453)    | 700 (479,921)     | 3304 (2936,3672)    | 2584 (2316,2852)    |
| Age 90-94y           | 2180 (1740,2620)   | 316 (264,368)    | 365 (308,421)    | 468 (410,527)    | 1435 (887,1983)   | 4781 (3999,5563)    | 3314 (2799,3829)    |
| Age 95y+             | 2963 (2040,3887)   | 367 (277,457)    | 372 (259,486)    | 630 (485,774)    | 2774 (1194,4355)  | 6831 (4833,8828)    | 4309 (3220,5399)    |
| Dementia             |                    |                  |                  |                  |                   |                     |                     |
| Age 85-89y           | 1990 (982,2998)    | 104 (42,165)     | 216 (124,307)    | 413 (290,536)    | 1160 (-160,2480)  | 3940 (2298,5581)    | 2707 (1583,3830)    |
| Age 90-94y           | 2820 (1774,3865)   | 190 (128,252)    | 290 (171,408)    | 541 (397,684)    | 1727 (49,3405)    | 5516 (3564,7468)    | 3903 (2703,5103)    |
| Age 95y+             | 2781 (1378,4184)   | 134 (58,209)     | 223 (60,386)     | 463 (238,687)    | 5200 (2081,8318)  | 8557 (5008,12106)   | 3594 (1963,5224)    |
| Four+ vs Three       |                    |                  |                  |                  |                   |                     |                     |
| No dementia          |                    |                  |                  |                  |                   |                     |                     |
| Age 85-89y           | 7549 (7298,7800)   | 784 (753,814)    | 1365 (1305,1426) | 1549 (1498,1601) | 4461 (4219,4702)  | 15982 (15548,16415) | 11273 (10953,11594) |
| Age 90-94y           | 8470 (7993,8947)   | 711 (666,757)    | 1170 (1092,1249) | 1553 (1485,1621) | 6077 (5554,6599)  | 18085 (17281,18889) | 11955 (11390,12520) |
| Age 95y+             | 8286 (7270,9301)   | 607 (511,703)    | 1084 (939,1228)  | 1513 (1339,1688) | 8355 (6863,9847)  | 19866 (17890,21842) | 11462 (10226,12698) |
| Dementia             |                    |                  |                  |                  |                   |                     |                     |
| Age 85-89y           | 9185 (8492,9877)   | 563 (519,607)    | 1094 (1007,1181) | 1665 (1577,1752) | 4725 (3786,5664)  | 17610 (16425,18796) | 12511 (11723,13298) |
| Age 90-94y           | 7587 (6733,8441)   | 419 (366,472)    | 828 (711,945)    | 1392 (1264,1520) | 4000 (2825,5176)  | 14210 (12770,15651) | 10272 (9266,11278)  |
| Age 95y+             | 6159 (4958,7361)   | 357 (289,425)    | 633 (492,773)    | 1254 (1051,1457) | 2349 (297,4401)   | 10538 (8122,12954)  | 8457 (7030,9883)    |
| Increases with age   |                    |                  |                  |                  |                   |                     |                     |
| Age 90-94y vs 85-89y |                    |                  |                  |                  |                   |                     |                     |
| No dementia          |                    |                  |                  |                  |                   |                     |                     |
| None                 | -71 (-140,-2)      | -65 (-77,-53)    | -74 (-94,-54)    | -125 (-144,-106) | -35 (-160,90)     | -387 (-542,-232)    | -310 (-431,-190)    |
| One                  | 211 (-25,447)      | -114 (-159,-70)  | 25 (-279,329)    | -151 (-198,-103) | 1207 (809,1604)   | 1126 (526,1727)     | 0 (-459,459)        |
| Two                  | 613 (321,905)      | -96 (-140,-53)   | -141 (-186,-97)  | -127 (-172,-82)  | 2292 (1890,2694)  | 2472 (1923,3022)    | 237 (-113,586)      |
| Three                | 1294 (904,1683)    | -108 (-149,-68)  | -109 (-167,-51)  | -67 (-123,-12)   | 3027 (2623,3431)  | 3949 (3314,4583)    | 966 (511,1422)      |
| Four or more         | 2215 (1849,2580)   | -181 (-212,-149) | -304 (-371,-236) | -64 (-126,-2)    | 4643 (4299,4988)  | 6052 (5464,6640)    | 1648 (1203,2093)    |
| Dementia             |                    |                  |                  |                  |                   |                     |                     |
| None                 | -1002 (-3230,1226) | -131 (-231,-32)  | -230 (-390,-69)  | -266 (-562,30)   | 5377 (1195,9559)  | 4167 (-478,8812)    | -1607 (-4032,818)   |
| One                  | -288 (-1583,1007)  | -229 (-303,-156) | -129 (-224,-35)  | -10 (-152,132)   | 8161 (5886,10435) | 7286 (4756,9816)    | -649 (-2074,776)    |
| Two                  | -871 (-1962,220)   | -301 (-368,-235) | -180 (-270,-90)  | -74 (-208,60)    | 6964 (5400,8528)  | 5440 (3582,7297)    | -1515 (-2729,-301)  |
| Three                | -42 (-965,882)     | -215 (-270,-161) | -106 (-224,13)   | 54 (-75,182)     | 7531 (6293,8769)  | 7016 (5494,8538)    | -319 (-1385,748)    |

| Comparisons       | Hospital costs      | Medication costs | ACCS costs       | Claim costs      | LTC costs           | Total costs          | No LTC total costs  |
|-------------------|---------------------|------------------|------------------|------------------|---------------------|----------------------|---------------------|
| Four or more      | -1639 (-2201,-1078) | -359 (-395,-323) | -371 (-451,-292) | -219 (-301,-137) | 6806 (6203,7410)    | 3616 (2769,4462)     | -2557 (-3212,-1902) |
| Age 95+ vs 90-94y |                     |                  |                  |                  |                     |                      |                     |
| No dementia       |                     |                  |                  |                  |                     |                      |                     |
| None              | -104 (-167,-41)     | -41 (-49,-33)    | -57 (-73,-41)    | -81 (-95,-67)    | -168 (-290,-46)     | -420 (-562,-277)     | -336 (-452,-220)    |
| One               | 95 (-380,570)       | -261 (-313,-210) | -312 (-618,-6)   | -232 (-302,-163) | 2409 (1346,3471)    | 1608 (332,2885)      | -603 (-1287,80)     |
| Two               | 512 (-105,1128)     | -308 (-365,-252) | -166 (-244,-88)  | -203 (-280,-126) | 4385 (3253,5517)    | 4144 (2750,5538)     | -204 (-909,500)     |
| Three             | 1295 (490,2101)     | -257 (-336,-177) | -158 (-253,-64)  | -42 (-173,90)    | 5724 (4517,6931)    | 6194 (4633,7754)     | 791 (-165,1747)     |
| Four or more      | 1110 (344,1877)     | -361 (-422,-300) | -245 (-372,-118) | -81 (-209,47)    | 8003 (7079,8926)    | 7975 (6652,9299)     | 299 (-640,1237)     |
| Dementia          |                     |                  |                  |                  |                     |                      |                     |
| None              | -1923 (-4297,450)   | -245 (-347,-144) | -233 (-341,-125) | -595 (-843,-347) | -5493 (-12326,1339) | -8928 (-16445,-1412) | -2941 (-5501,-380)  |
| One               | -1888 (-4308,532)   | -358 (-433,-282) | -259 (-366,-152) | -481 (-663,-298) | 2093 (-2081,6267)   | -925 (-5826,3977)    | -3010 (-5571,-449)  |
| Two               | -2931 (-4138,-1724) | -333 (-399,-266) | -183 (-310,-56)  | -146 (-324,32)   | 5303 (2667,7940)    | 1388 (-1578,4354)    | -3629 (-4994,-2264) |
| Three             | -2970 (-4197,-1742) | -389 (-457,-321) | -249 (-403,-96)  | -224 (-413,-35)  | 8776 (6798,10754)   | 4429 (2103,6755)     | -3938 (-5377,-2500) |
| Four or more      | -4397 (-5183,-3612) | -451 (-499,-404) | -445 (-543,-347) | -362 (-504,-220) | 7125 (6149,8100)    | 756 (-528,2041)      | -5754 (-6695,-4812) |

ACCS Ambulatory Care Classification System, CAD Canadian dollars, CI confidence interval, LTC long-term care

Marginal differences in mean annual costs (in CAD) are reported: for dementia vs no dementia by age and number of morbidities categories; for increases in the number of morbidities by dementia and age categories and; for increases in age category by dementia and number of morbidities categories. These models include 3-way and 2-way interactions terms for dementia, age, and number of morbidity. No LTC costs include hospitalizations, medications, ACCS and provider claims All costs are reported in \$1000 Canadian dollar units and are inflated to 2017 costs using the consumer price index for all items in Canada. Unshaded cells show significant increases in cost; shaded cells show significant decreases in cost and grey font shows non-significant differences.

**Figure S1. Marginal annual mean costs (in CAD) for dementia by age and number of morbidities in participants ≥65 years, excluding costs of long-term care**

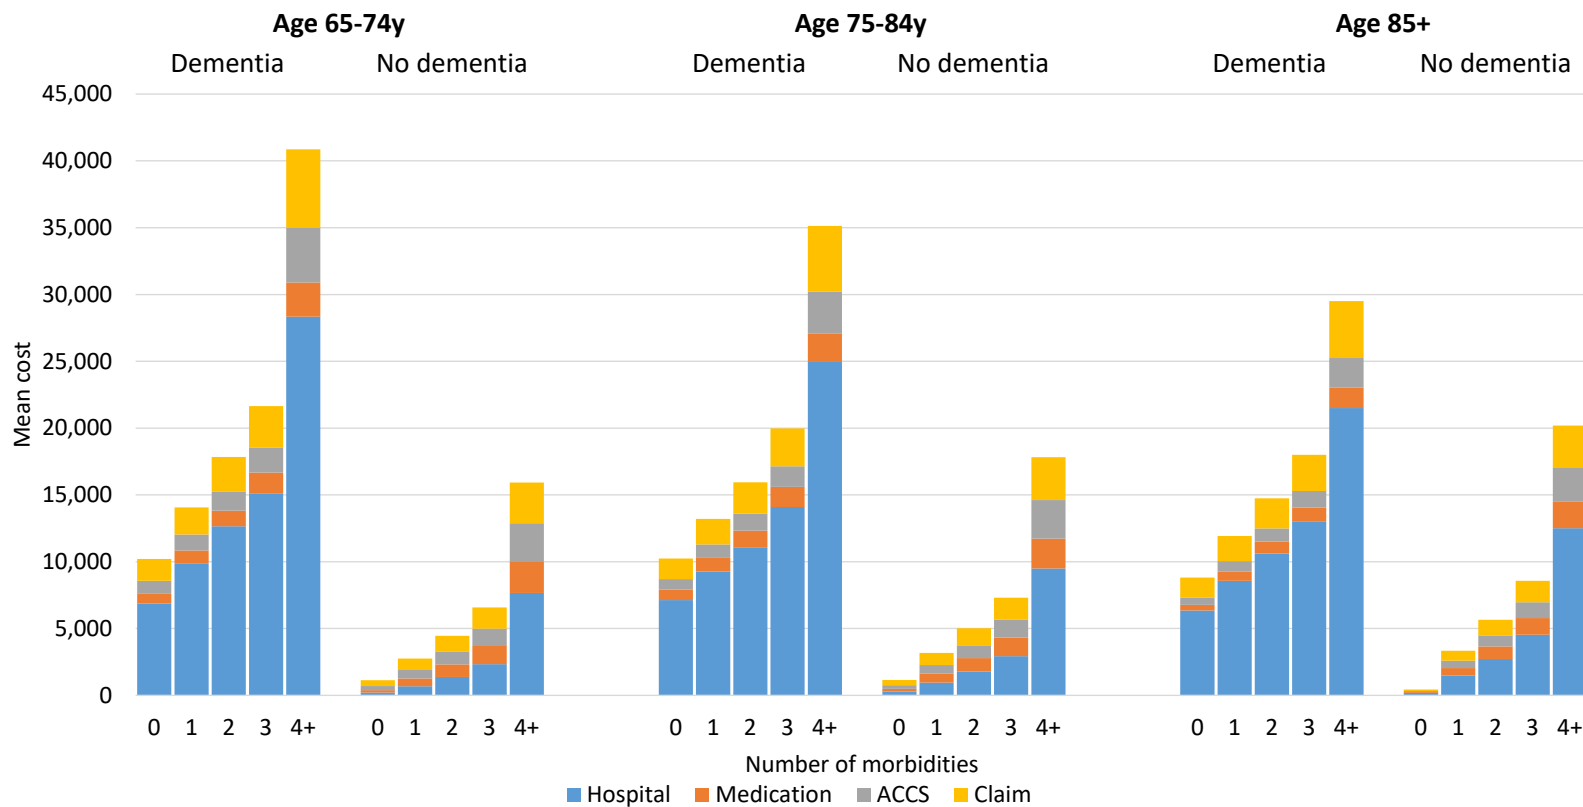

ACCS Ambulatory Care Classification System, CAD Canadian dollars

**Figure S2. Marginal annual mean costs (in CAD) for dementia by age and number of morbidities in participants ≥85 years, excluding costs of long-term care**

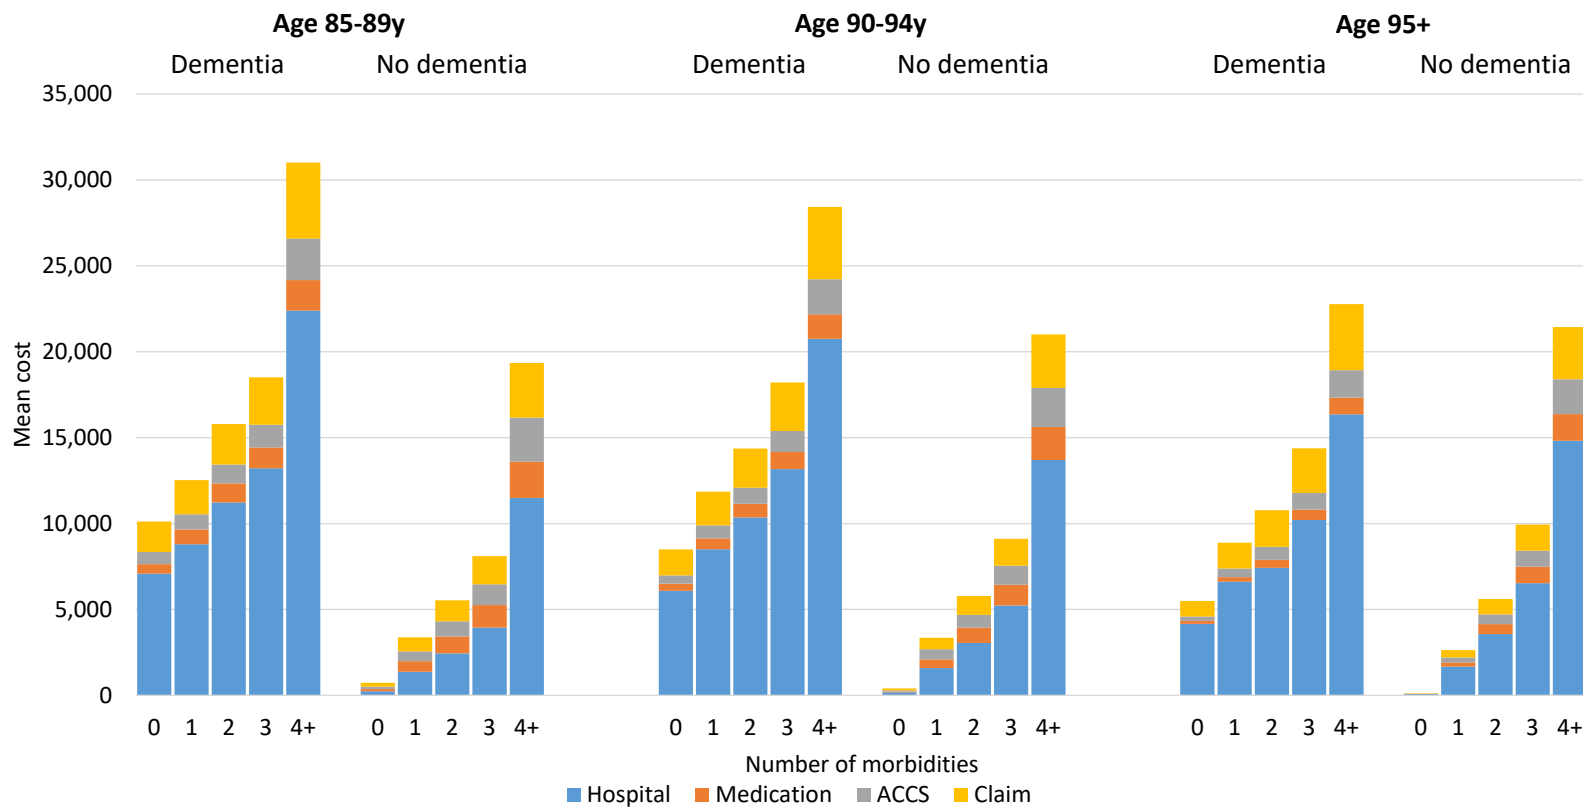

ACCS Ambulatory Care Classification System, CAD Canadian dollars

Appendix 1, as supplied by the author. Appendix to: Tonelli M, Wiebe N, Joannette Y, et al. Age, multimorbidity and dementia with health care costs in older Albertan people: a population-based retrospective cohort study. *CMAJ Open* 2022. DOI: 10.9778/cmajo.2021003500289. Copyright © 2022 The Author(s) or their employer(s). To receive this resource in an accessible format, please contact us at [cmajgroup@cmaj.ca](mailto:cmajgroup@cmaj.ca).
