# Supplementary material for: Age, multimorbidity and dementia with health care costs in older people in Alberta: a population-based retrospective cohort study
Source: PubMed Central journal article supplement — CMAJ Open. 2022 Jul 5;10(3):E577–88. doi: 10.9778/cmajo.20210035 (PMC9262346; doi:10.9778/cmajo.20210035), 2022-07-05
Supplement: open_2021-0035_original_submission.pdf [file open_2021-0035_original_submission.pdf]

1  
2  
3 **Age, multimorbidity, and dementia with health care costs in older Canadian people: a**  
4 **population-based cohort study**  
5  
6  
7

8 Marcello Tonelli MD SM MSc, Department of Medicine, University of Calgary  
9 Natasha Wiebe MMath PStat, Department of Medicine, University of Alberta  
10 Yves Joannette, Département de psychiatrie et d'addictologie, Université de Montréal  
11 Brenda R. Hemmelgarn MD PhD, Department of Medicine, University of Alberta  
12 Helen So PhD, Department of Medicine, University of Alberta  
13 Sharon Straus MD PhD, Department of Medicine, University of Toronto  
14 Matthew T. James MD PhD, Department of Medicine, University of Calgary  
15 Braden J. Manns MD MSc, Department of Medicine, University of Calgary  
16 Scott W. Klarenbach MD MSc, Department of Medicine, University of Alberta  
17  
18  
19  
20  
21  
22  
23  
24  
25  
26  
27  
28  
29  
30  
31  
32  
33  
34

35 **Running Title:** Age, morbidity and dementia  
36  
37  
38  
39

40 **No reprints will be available. Correspondence to:**

41 Marcello Tonelli, University of Calgary  
42 7th Floor, TRW Building, 3280 Hospital Drive NW  
43 Calgary, Alberta, Canada T2N 4Z6  
44 Tel: 403 210 6930  
45 Email: tonelli.admin@ucalgary.ca  
46  
47  
48

49 **Key words:** multimorbidity, dementia, older adults  
50  
51

52 **Word count:** 3,127  
53  
54  
55  
56  
57  
58  
59  
60

**ABSTRACT**

**Background:** The aging of the general population is expected to lead to increases in multimorbidity and dementia. The intersection of age, dementia and multimorbidity poses potential challenges for the sustainability of health systems worldwide.

**Objective:** We sought to examine how age, dementia and multimorbidity jointly associate with health care costs.

**Methods:** We did a retrospective population-based cohort study in Alberta, Canada with 827,947 adults aged  $\geq 65$  years between April 2003 and March 2017. We identified comorbidities using 30 validated algorithms applied to administrative health data and assessed costs associated with hospitalization, provider billing, ambulatory care, medications, and long-term care (LTC).

**Results:** Dementia was associated with higher mean annual total costs and all individual mean component costs. Similarly increasing number of morbidities was associated with higher mean total costs and the component costs. Increasing age was associated with higher total costs for people with and without dementia, driven by increasing LTC costs. However, there were no consistent trends between age and non-LTC costs among people with dementia. When costs attributable to LTC were excluded, there was evidence that older age was associated with lower costs for hospitalization, medications, and ambulatory care among people with dementia.

**Interpretation:** Multimorbidity, older age and dementia were all associated with increased use of long-term care and thus health care costs, but some costs among people with dementia decreased at older ages. These findings illustrate the complexity of projecting the economic consequences of the aging population, which must account for the interplay between multimorbidity and dementia.

## INTRODUCTION

The presence of multiple chronic conditions is termed multimorbidity<sup>1</sup>, and is associated with worse clinical outcomes compared to good health or to the presence of a single chronic condition.<sup>2-5</sup> Dementia is an important contributor to multimorbidity, and in fact, factors that contribute to multimorbidity (such as vascular disease) can also cause dementia. Like multimorbidity, the prevalence of dementia increases in parallel with age. Therefore, the aging of the general population is expected to lead to further increases in the burden of both multimorbidity and dementia. Since both dementia and multimorbidity are independently associated with increased health care costs and an increased likelihood of requiring long-term care (LTC),<sup>6,7</sup> the intersection of age, dementia and multimorbidity poses potential challenges for the sustainability of health systems worldwide.<sup>8</sup> Given the potential for overlap and statistical interactions between these various exposures, there is potential for bias if individual associations are used to examine associations with cost. Rather, an approach which simultaneously considers the joint associations between these exposures and healthcare costs is preferable.

We used a large population-based dataset of all 827,947 people aged 65 years or greater and living in a defined geographical area to characterize the frequency of dementia and 29 other common chronic conditions. We examined the joint associations between age, dementia, and burden of morbidity with total healthcare costs, comprised of costs related to hospitalization, provider billing, use of ambulatory or emergency care, medications, and long-term care (defined as care and services for those who cannot live independently or who require onsite nursing care, 24-hour supervision, or personal support).<sup>9</sup> Our goal was to advance the available literature by considering joint associations rather than pairwise associations between these three key exposures and total healthcare costs.

## METHODS

We reported this retrospective population-based cohort study according to the STROBE guidelines.<sup>10</sup>

The institutional review boards at the Universities of Alberta (Pro00053469) and Calgary (REB16-1575) approved this study and waived the requirement for participants to provide consent due to the large sample size. Data were de-identified.

### *Data sources and cohort*

We used the Alberta Kidney Disease Network (AKDN) database, which incorporates data from Alberta Health (AH; the provincial health ministry) such as provider claims, hospitalizations and ambulatory care utilization; Alberta laboratory data, and Alberta Blue Cross prescription data.<sup>11</sup> All people registered with AH were included in the database; all Alberta residents are eligible for insurance coverage by AH and >99% participate in coverage. We linked postal codes for the last known residential address of each participant to Statistics Canada's Postal Code Conversion File Plus ([www.statcan.ca](http://www.statcan.ca)) to obtain rural/urban status and neighbourhood (postal code) income quintiles for each relevant fiscal year. We used the database to assemble a cohort of adults aged  $\geq 65$  years who resided in Alberta, Canada between April 2003 and March 2017. We followed participants from April 2003, their 65<sup>th</sup> birthday, or registration with AH (whichever was later) until March 2017, death, or migration out of the province.

### *Comorbidities*

We used a previously published list of validated algorithms for 29 chronic conditions that could be applied to claims data and had positive predictive values  $\geq 70\%$ <sup>12</sup>: alcohol misuse, asthma, atrial fibrillation, lymphoma, non-metastatic cancer (breast, cervical, colorectal, pulmonary, and prostate), metastatic cancer, chronic heart failure, chronic pain, chronic obstructive pulmonary disease, chronic hepatitis B, cirrhosis, severe constipation, dementia, depression, diabetes, epilepsy, hypertension,

1  
2  
3  
4  
5  
6  
7  
8  
9  
10  
11  
12  
13  
14  
15  
16  
17  
18  
19  
20  
21  
22  
23  
24  
25  
26  
27  
28  
29  
30  
31  
32  
33  
34  
35  
36  
37  
38  
39  
40  
41  
42  
43  
44  
45  
46  
47  
48  
49  
50  
51  
52  
53  
54  
55  
56  
57  
58  
59  
60

hypothyroidism, inflammatory bowel disease, irritable bowel syndrome, multiple sclerosis, myocardial infarction, Parkinson's disease, peptic ulcer disease, peripheral vascular disease, psoriasis, rheumatoid arthritis, schizophrenia, and stroke or transient ischemic attack. Dementia was one of the 29 conditions and was defined by the presence of 1 hospitalization or 2 physician claims within 2 years (ICD-9 290, 294.1, 331.2 or ICD-10 F00-F03, F05.1, G30, G31.1).<sup>13</sup> A validated algorithm for gout<sup>14</sup> was included in the set of comorbidities. We also considered chronic kidney disease (CKD) as a 31<sup>st</sup> condition that was defined by any of the following: mean annual estimated glomerular filtration rate (eGFR) <60 mL/min\*1.73m<sup>2</sup>; a median annual presence of albuminuria (albumin:creatinine ratio ≥30 mg/g, protein:creatinine ratio ≥150 mg/g or dipstick proteinuria ≥ trace); two outpatient physician claims for dialysis; or, one hospitalization or one outpatient claim for kidney transplantation. We classified each participant with respect to the presence or absence of dementia and the 30 other chronic conditions for each fiscal year.<sup>15</sup> If a participant developed a condition within a fiscal year or at any point previously (lookback extended as far as April 1994 where records were available), we classified him/her as having the condition. Detailed methods for classifying morbidity status and the specific algorithms used are found elsewhere.<sup>12</sup>

### *Costs and long-term care*

The primary outcome was mean annual total health care costs; the cost components were hospitalization, provider visits (primary care or specialists), ambulatory care (including emergency department (ED) visits), medications, and long-term care. For all hospitalizations and ambulatory care classification system (ACCS) charges between fiscal years 2004 and 2017, we used the Canadian Institute for Health Information's resource intensive weights (RIW) from the administrative data and Alberta's cost of a standard hospital stay (CSHS).<sup>16</sup> We used grouper codes for ACCS charges from fiscal years 2004 to 2010, and RIW and CSHS for the years thereafter. Costs for provider visits (inpatient and outpatient)

1  
2  
3 were the actual amounts charged to Alberta Health Services or for physicians on the alternative  
4  
5 payment program we based costs on the mean amounts charged by the other physicians. Medication  
6  
7 costs were those listed with Alberta Blue Cross. We also measured time residing in long-term care home  
8  
9 (e.g., nursing homes, auxiliary hospitals) and estimated costs based on the average daily cost (\$218.16  
10  
11 CAD; from Alberta Health) of all such homes in Alberta (individual level data on the type of long-term  
12  
13 care was not available). We classified participants as residing in long-term care if they were discharged  
14  
15 to a long-term care home after hospitalization, or if we identified two provider claims at least 30 days  
16  
17 apart for services provided in a long-term care home; we deemed long-term care to have begun on the  
18  
19 earlier of the date of discharge and the date of the first claim respectively. All costs are reported in  
20  
21 \$1000 Canadian dollar units and are inflated to 2017 costs using the consumer price index for all items  
22  
23 in Canada. All data (demographics, morbidities and costs) were linked and organized by participant and  
24  
25  
26  
27  
28  
29  
30  
31  
32  
33  
34  
35  
36  
37  
38  
39  
40  
41  
42  
43  
44  
45  
46  
47  
48  
49  
50  
51  
52  
53  
54  
55  
56  
57  
58  
59  
60

### *Statistical analyses*

We did analyses with Stata MP 15.1 ([www.stata.com](http://www.stata.com)) and reported baseline (first fiscal year within follow-up) descriptive statistics as counts and percentages, or medians and inter-quartile ranges, as appropriate.

In order to examine the associations between dementia, increasing morbidity burden and age with cost outcomes, we used generalized linear models with a zero-inflated negative binomial distribution and a log-link. We allowed for intra-participant correlation in our standard errors – this allowed participants to contribute multiple fiscal years of cost data. We regressed outcomes on dementia, the number of other (non-dementia) morbidities (categorized as none, 1, 2, 3, 4, and 5 or more), age (categorized as 65-74, 75-84, and  $\geq 85$  years), their 3-way interaction and all three 2-way interactions; also sex, rural or urban

1  
2  
3 residence and the lowest neighbourhood (postal code) income quintile. We allowed all covariates to  
4 vary on a year-by-year basis; an offset term was used to account for partial and full years. Only  
5 rural/urban residence and the lowest neighbourhood income quintile had missing values – both 7%. In  
6 the models, missing values were imputed with the most frequent category (i.e., imputed as urban and  
7 not the lowest neighbourhood income quintile). We also did additional analyses that further examined  
8 the oldest age groups categorized as 85-89, 90-95, and  $\geq 95$  years. We determined independence of  
9 residuals by examining plots of residuals versus fitted values. The threshold  $p$  for statistical significance  
10 was set at 0.05. We reported adjusted means with 95% confidence intervals. We compared differences  
11 in means between those with dementia and those without, between adjacent age categories, and  
12 between adjacent morbidity categories using Chi-square tests.  
13  
14  
15  
16  
17  
18  
19  
20  
21  
22  
23  
24  
25  
26  
27

## 28 RESULTS

### 29 *Characteristics of study participants*

30 Participant flow is shown in Supplemental eFigure 1. There were 827,947 participants; median follow-up  
31 was 6.5 years (range 1 day to 14.0 years; 2% of participants out-migrated before the end of follow-up).  
32 Twenty-six percent of participants died during follow-up. Participants could contribute follow-up to  
33 more than one age category: 661,755 participants were followed while 65-74 years of age, 354,161  
34 while 75-84 years, and 158,538 while 85 years and older (Table 1). The percentage of participants with  
35 dementia increased with age, from 1.4% to 21.9%. The percentage of participants who were men  
36 decreased with age, from 49.8% to 37.3%. More participants living with dementia resided in a low-  
37 income neighbourhood than participants without dementia in the 65-74 years group, but this difference  
38 diminished with increasing age and was absent in those aged  $\geq 85$  years. Compared to those without  
39 dementia, participants with dementia consistently had more comorbidity across all age groups.  
40  
41  
42  
43  
44  
45  
46  
47  
48  
49  
50  
51  
52  
53  
54  
55  
56  
57  
58  
59  
60

1  
2  
3 *Adjusted annual mean costs*  
4

5 Total adjusted annual mean costs and all individual component costs were higher if dementia was  
6 present (Table 2; Figure 1). Similarly mean total costs and the component costs increased in parallel with  
7 the number of morbidities, whether dementia was present or not. Mean total costs (driven by LTC costs)  
8 and LTC costs increased in parallel with age, but there were no consistent trends for other component  
9 costs with increasing age.  
10  
11  
12  
13  
14  
15

16  
17  
18 Among people without dementia, mean annual costs for medications, ACCS, and claims increased from  
19 65-74 years of age to 75-84 years of age and then decrease from 75-84 years of age to 85 years of age  
20 (Supplemental eFigure 2). Hospitalizations and LTC costs increased in parallel with age.  
21  
22  
23  
24

25  
26  
27 In participants with dementia, LTC was the largest component of costs followed by hospitalizations,  
28 claims, ACCS and medications. Mean costs for LTC and mean total costs (driven by LTC costs) increased  
29 with age among participants with dementia. When LTC costs were excluded, older age was associated  
30 with lower costs – and there was an inverse association between hospitalization, medication, ACCS and  
31 claim costs and increasing age-(Table 2; eFigure 2).  
32  
33  
34  
35  
36  
37  
38  
39  
40

41 In a sensitivity analysis, we further divided participants aged  $\geq 85$  years into the following categories: 85-  
42 89 years of age, 90-94 years, and 95 years and older. There were 144,134, 69,615, and 23,736  
43 participants contributing follow-up to each age group, respectively. The results were similar to that of  
44 the whole study population. Dementia was associated with higher mean total costs and component  
45 costs, and there was also an association between higher costs and the number of morbidities. For  
46 people with and without dementia, there was an association between LTC costs (and thus total costs)  
47 and increasing age. However, after LTC costs were excluded, there was evidence of decreasing costs  
48  
49  
50  
51  
52  
53  
54  
55  
56  
57  
58  
59  
60



1  
2  
3 among older participants, with those aged >95 years having the lowest non-LTC costs (Table 3;  
4 Supplemental eFigure 3).  
5  
6  
7  
8  
9

10 Inspection of the burden of comorbidity among the oldest participants demonstrated that comorbidity  
11 was surprisingly infrequent among those without dementia. For example, among participants aged >95  
12 years and without dementia, 56% of the participant-years were lived with  $\leq 1$  comorbidity.  
13  
14  
15  
16  
17

### 18 **INTERPERTATION**

19  
20 In this population-based study of more than 800,000 older adults treated in a universal health system,  
21 we found strong graded associations between multimorbidity, dementia and total health care costs.  
22  
23 Older age was associated with significant increases in mean annual health care costs, driven by a strong  
24 association between older age and LTC utilization. As expected, dementia was associated with high  
25 health care costs that were driven by high utilization of LTC. After LTC costs were excluded, the presence  
26 of dementia appeared to modify the relation between age and costs, such that older age was associated  
27 with increased non-LTC costs among those without dementia, but not necessarily among those with  
28 dementia. In fact, when long-term care resource use was excluded, there was evidence that older age  
29 was associated with lower mean annual costs among people with dementia, including lower costs for  
30 hospitalization, medications, and ambulatory care.  
31  
32  
33  
34  
35  
36  
37  
38  
39  
40  
41  
42  
43  
44  
45

46 These findings provide insight into how health care costs may change over time in parallel with the  
47 anticipated aging of the general population, and therefore which interventions should be the highest  
48 priority to mitigate the consequences of this demographic shift. First, to the extent that the costs  
49 associated with multimorbidity and with dementia were higher among people of older age, an increased  
50 prevalence of these conditions will exaggerate the economic consequences of the aging population,  
51  
52  
53  
54  
55  
56  
57  
58  
59  
60

1  
2  
3 whereas interventions that prevent these conditions (or reduce their severity) will have the opposite  
4 effect. Second, since long-term care is such an important driver of health care resource use, providing  
5 additional supports to enable older people to live independently rather than entering long-term care  
6 would likely yield economic benefits as well as better quality of life. This may prove more difficult for  
7 adults with dementia and for those with physical comorbidities. Third, we do not have data that directly  
8 explains the inverse association between costs and age among people with dementia once long-term  
9 care costs were excluded. One possibility is survivorship effects, where those that survive to advanced  
10 age despite dementia may have less morbidity and thus require less costly care. An alternative (not  
11 mutually exclusive) is that provider attitudes or patient preferences mean that the care provided to  
12 people with dementia is less aggressive than that provided to those without dementia – thus leading to  
13 lower individual costs associated with hospitalization, medications, emergency care and provider claims.  
14 Costs associated with acute care for older people with dementia might be reduced further if LTC homes  
15 enhance their ability to provide services that are currently restricted to hospitals, which would in turn  
16 require additional training and resources. The ongoing reviews of LTC that have been triggered by the  
17 COVID-19 pandemic may offer an opportunity to consider these issues in detail.<sup>17</sup>

18  
19  
20  
21  
22  
23  
24  
25  
26  
27  
28  
29  
30  
31  
32  
33  
34  
35  
36  
37  
38  
39 Previous studies and a high-quality systematic review have demonstrated that multimorbidity (with or  
40 without dementia) is correlated with higher health care costs.<sup>7,18-22</sup> Prior work also demonstrates that  
41 dementia is associated with increased costs, especially those due to hospitalization.<sup>6,23</sup> However, most  
42 such studies have not been able to assess long-term care utilization, which is an important contributor  
43 to total costs in older people (representing 32% of all health care costs in our cohort). Some prior  
44 studies have examined how multimorbidity associates with a broad range of health care costs, including  
45 long-term care and other forms of social care.<sup>24,25</sup> These studies have generally reached similar  
46 conclusions to our own, but have generally not explored the intersection between dementia,  
47  
48  
49  
50  
51  
52  
53  
54  
55  
56  
57  
58  
59  
60

1  
2  
3 multimorbidity and costs as we were able to do. We also assessed a broader range of comorbidities than  
4  
5 most prior studies of costs and dementia (or costs and multimorbidity), many of which focus on highly  
6  
7 prevalent conditions such as vascular disease and diabetes.<sup>22</sup> An exception is the 2012 Symphony study  
8  
9 from the UK, which assessed the intersection between age, dementia and a broad panel of  
10  
11 comorbidities in a much smaller population (N with dementia = 1026).<sup>26</sup> Our findings are generally  
12  
13 consistent with the Symphony study, which also showed that multimorbidity and dementia are more  
14  
15 strongly correlated with cost than is age per se. Overall, the available evidence suggests that accurately  
16  
17 projecting the economic consequences of the aging population is complicated and must account for the  
18  
19 interplay between comorbidity and dementia as well as increasing age.  
20  
21  
22  
23

24 Our study has important strengths, including its rigorous analytical methods, use of validated algorithms  
25  
26 for ascertaining the presence of dementia and morbidity, and the large, geographically defined cohort  
27  
28 on which it was based. However, our study also has limitations that should be considered. First,  
29  
30 administrative data will underestimate the true prevalence of dementia and other morbidities  
31  
32 compared to a gold standard such as a structured interview – and because health care utilization  
33  
34 increases with age, our focus on older people aged  $\geq 65$  years should reduce the extent of such  
35  
36 underestimation. Second, the validated algorithm that we used to classify participants with dementia  
37  
38 has positive predictive value of 93% and sensitivity of 67%.<sup>13</sup> Therefore, our findings will have  
39  
40 misclassified some participants with respect to dementia. To the extent that such misclassification may  
41  
42 have been random rather than systematic, this should have tended to bias our findings toward the null  
43  
44 and thus should not have affected the observed associations between age, dementia and costs. Third,  
45  
46 although we were able to extend further studies by including long-term care utilization, we were not  
47  
48 able to capture costs from outside the health sector, such as those due to unpaid care (a major  
49  
50 contributor to the societal costs of dementia<sup>27</sup>), private sector care, or out-of-pocket costs for patients  
51  
52 and families.<sup>28</sup> Fourth, the exact per-person cost of long term was not available as only average per diem  
53  
54  
55  
56  
57  
58  
59  
60

1  
2  
3 cost was available; costs for patients with greater care requirements such as those with dementia are  
4 likely underestimated (and overestimated for those with lower care needs). Fifth, we did not have  
5 information on functional status, frailty, disabilities, or the severity of morbidities, and thus we relied on  
6 the total count of morbidities, which is relatively crude. More severe morbidity for a given morbidity  
7 count would be expected to increase the likelihood of LTC, which might in turn affect costs. However,  
8 this misclassification of morbidity is likely to have biased toward the null and so should not have  
9 affected our conclusions. Finally, we studied people from a single Canadian province and our findings  
10 may not apply to other settings.  
11  
12  
13  
14  
15  
16  
17  
18  
19  
20  
21  
22

23 To gain additional insights about how the aging population may influence health care costs, future  
24 studies should combine the projected population structure in the coming decades with data examining  
25 the interplay between age, multimorbidity, dementia and costs, such as the findings presented herein. A  
26 more detailed examination of which conditions (or which clusters of conditions) account for most  
27 multimorbidity-related costs would likely improve the precision of these future studies. Out-of-pocket  
28 costs and opportunity costs (for unpaid labour) borne by caregivers and families should also be captured  
29 by such studies, since they likely account for a substantial proportion of the total economic burden  
30 associated with dementia. Finally, as previously noted, new methods for preventing dementia,  
31 attenuating multimorbidity and promoting independent living among older adults should be extremely  
32 high priority for future research.  
33  
34  
35  
36  
37  
38  
39  
40  
41  
42  
43  
44  
45  
46  
47

## 48 **CONCLUSION**

49  
50 In conclusion, multimorbidity or dementia were associated with higher mean annual health care costs.  
51 As expected, older age was associated with increased use of long-term care and thus health care costs  
52 among those with and without dementia, and dementia was associated with substantially increased  
53  
54  
55  
56  
57  
58  
59  
60

1  
2  
3 utilization of long-term care. However, whereas older age was associated with higher costs of  
4  
5 hospitalization, medications, acute care and provider claims among those without dementia, the  
6  
7 converse was true among those with dementia, for whom there was an inverse association between  
8  
9 older age and total costs once costs attributable to long-term care were excluded. These findings  
10  
11 suggest that projecting the economic consequences of the aging population is complicated and must  
12  
13 account for the interplay between comorbidity and dementia as well as increasing age.  
14  
15  
16  
17  
18  
19  
20  
21  
22  
23  
24  
25  
26  
27  
28  
29  
30  
31  
32  
33  
34  
35  
36  
37  
38  
39  
40  
41  
42  
43  
44  
45  
46  
47  
48  
49  
50  
51  
52  
53  
54  
55  
56  
57  
58  
59  
60

Confidential

1  
2  
3 **Competing Interests:** None reported.  
4

5 **Author Contributions:** MT and SK conceived the study. MT, NW and SK designed the study and drafted  
6 the manuscript. NW performed the statistical analyses. All authors have made substantial contributions  
7 to the development of the manuscript, all have been involved in revising it for important intellectual  
8 content and all approved the final version. MT had full access to all the data in the study and takes  
9 responsibility for the integrity of the data and the accuracy of the data analysis.  
10  
11

12 **Funding:** This research (to MT) was supported by the Canadian Institutes for Health Research (FRN  
13 143211), and a Leaders Opportunity Fund grant from the Canada Foundation for Innovation. MT was  
14 supported by the David Freeze chair in health services research.  
15

16 **Role of Funder/Sponsor:** The sponsors had no role in the design and conduct of the study; collection,  
17 management, analysis, and interpretation of the data; preparation, review, or approval of the  
18 manuscript; nor in the decision to submit the manuscript for publication.  
19  
20

21 **Data Sharing Statement:** We are not able to make our dataset available to other researchers due to our  
22 contractual arrangements with the provincial health ministry (Alberta Health), who is the data  
23 custodian. Researchers may make requests to obtain a similar dataset at  
24 <https://sporresources.researchalberta.ca>.  
25  
26

27 **Disclaimer:** This study is based in part by data provided by Alberta Health and Alberta Health Services.  
28 The interpretation and conclusions contained herein are those of the researchers and do not represent  
29 the views of the Government of Alberta or Alberta Health Services. Neither the Government of Alberta  
30 nor Alberta Health or Alberta Health Services express any opinion in relation to this study.  
31

32 **Additional Contributions:** Ghenette Houston, BA, University of Alberta provided administrative support  
33 and Sophanny Tiv, BSc, University of Alberta provided technical support.  
34  
35  
36  
37  
38  
39  
40  
41  
42  
43  
44  
45  
46  
47  
48  
49  
50  
51  
52  
53  
54  
55  
56  
57  
58  
59  
60

## References

1. Fortin M, Lapointe L, Hudon C, Vanasse A. Multimorbidity is common to family practice. Is it commonly researched? *Can Fam Physician*. 2005;51:244-5.
2. Barnett K, Mercer SW, Norbury M, Watt G, Wyke S, Guthrie B. Epidemiology of multimorbidity and implications for health care, research, and medical education: a cross-sectional study. *Lancet*. 2012;380:37-43.
3. Fortin M, Hudon C, Haggerty J, van den Akker M, Almirall J. Prevalence estimates of multimorbidity: a comparative study of two sources. *BMC Health Serv Res*. 2010;10:111.
4. Lehnert T, Heider D, Leicht H, et al. Review: health care utilization and costs of elderly persons with multiple chronic conditions. *Med Care Res Rev*. 2011;68:387-420.
5. Perruccio AV, Katz JN, Losina E. Health burden in chronic disease: multimorbidity is associated with self-rated health more than medical comorbidity alone. *J Clin Epidemiol*. 2012;65:100-6.
6. Kaczynski A, Michalowsky B, Eichler T, et al. Comorbidity in Dementia Diseases and Associated Health Care Resources Utilization and Cost. *J Alzheimers Dis*. 2019;68:635-46.
7. Wang L, Si L, Cocker F, Palmer AJ, Sanderson K. A Systematic Review of Cost-of-Illness Studies of Multimorbidity. *Appl Health Econ Health Policy*. 2018;16:15-29.
8. Sinha SK. Living Longer, Living Well: Report submitted to the Minister of Health and Long-Term Care and the Minister Responsible for Seniors on recommendations to inform a Seniors Strategy for Ontario. 2012; [http://www.health.gov.on.ca/en/common/ministry/publications/reports/seniors\\_strategy/](http://www.health.gov.on.ca/en/common/ministry/publications/reports/seniors_strategy/). Accessed October 15, 2020.
9. Government of Ontario, Ministry of Health, Care MoL-T. Home, Community, and Residential Care Services. 2017; <http://health.gov.on.ca/en/public/programs/ltc/glossary.aspx>. Accessed October 15, 2020.
10. von Elm E, Altman DG, Egger M, et al. The Strengthening the Reporting of Observational Studies in Epidemiology (STROBE) statement: guidelines for reporting observational studies. *Lancet*. 2007;370:1453-7.
11. Hemmelgarn BR, Clement F, Manns BJ, et al. Overview of the Alberta Kidney Disease Network. *BMC Nephrol*. 2009;10:30.
12. Tonelli M, Wiebe N, Martin F, et al. Methods for identifying 27 chronic conditions: Application to administrative data. *BMC Med Inform Decis Mak*. 2015;15:31.
13. Quan H, Li B, Saunders LD, et al. Assessing validity of ICD-9-CM and ICD-10 administrative data in recording clinical conditions in a unique dually coded database. *Health Serv Res*. 2008;43:1424-41.
14. Singh JA. Veterans Affairs databases are accurate for gout-related health care utilization: a validation study. *Arthritis Res Ther*. 2013;15:R224.
15. Stevens PE, Levin A, Kidney Disease: Improving Global Outcomes Chronic Kidney Disease Guideline Development Work Group M. Evaluation and management of chronic kidney disease: synopsis of the kidney disease: improving global outcomes 2012 clinical practice guideline. *Ann Intern Med*. 2013;158:825-30.
16. Canadian Institute for Health Information. *Understanding Variability in the Cost of a Standard Hospital Stay*. Ottawa, ON: CIHI;2017.
17. Ombudsman Ontario. Ontario ombudsman to investigate government's oversight of long-term care homes during pandemic. 2020; [https://www.ombudsman.on.ca/resources/news/press-releases/2020/ontario-ombudsman-to-investigate-government's-oversight-of-long-term-care-homes-during-pandemic](https://www.ombudsman.on.ca/resources/news/press-releases/2020/ontario-ombudsman-to-investigate-government-s-oversight-of-long-term-care-homes-during-pandemic). Accessed October 15, 2020.
18. Zulman DM, Pal Chee C, Wagner TH, et al. Multimorbidity and healthcare utilisation among high-cost patients in the US Veterans Affairs Health Care System. *BMJ Open*. 2015;5:e007771.

- 1  
2  
3 19. Bahler C, Huber CA, Brungger B, Reich O. Multimorbidity, health care utilization and costs in an  
4 elderly community-dwelling population: a claims data based observational study. *BMC Health Serv Res.*  
5 2015;15:23.  
6  
7 20. Brilleman SL, Purdy S, Salisbury C, Windmeijer F, Gravelle H, Hollinghurst S. Implications of  
8 comorbidity for primary care costs in the UK: a retrospective observational study. *Br J Gen Pract.*  
9 2013;63:e274-82.  
10  
11 21. Griffith LE, Gruneir A, Fisher K, et al. Patterns of health service use in community living older  
12 adults with dementia and comorbid conditions: a population-based retrospective cohort study in  
13 Ontario, Canada. *BMC Geriatr.* 2016;16:177.  
14  
15 22. Griffith LE, Gruneir A, Fisher K, et al. Insights on multimorbidity and associated health service  
16 use and costs from three population-based studies of older adults in Ontario with diabetes, dementia  
17 and stroke. *BMC Health Serv Res.* 2019;19:313.  
18  
19 23. Zhu CW, Cosentino S, Ornstein K, Gu Y, Andrews H, Stern Y. Use and cost of hospitalization in  
20 dementia: longitudinal results from a community-based study. *Int J Geriatr Psychiatry.* 2015;30:833-41.  
21  
22 24. medRxiv: The preprint server for health sciences. Multimorbidity within households and health  
23 and social care utilisation and cost: retrospective cohort study using administrative data. 2020;  
24 <https://www.medrxiv.org/content/10.1101/2020.03.20.20022335v1>. Accessed October 15, 2020.  
25  
26 25. Picco L, Achilla E, Abdin E, et al. Economic burden of multimorbidity among older adults: impact  
27 on healthcare and societal costs. *BMC Health Serv Res.* 2016;16:173.  
28  
29 26. Kasteridis P, Street A, Dolman M, et al. The importance of multimorbidity in explaining  
30 utilisation and costs across health and social care settings: evidence from South Somerset's Symphony  
31 Project 2014;  
32 [http://eprints.whiterose.ac.uk/136185/1/CHERP96\\_multimorbidity\\_utilisation\\_costs\\_health\\_social\\_care](http://eprints.whiterose.ac.uk/136185/1/CHERP96_multimorbidity_utilisation_costs_health_social_care.pdf)  
33 [.pdf](http://eprints.whiterose.ac.uk/136185/1/CHERP96_multimorbidity_utilisation_costs_health_social_care.pdf). Accessed October 15, 2020.  
34  
35 27. El-Hayek YH, Wiley RE, Khoury CP, et al. Tip of the Iceberg: Assessing the Global Socioeconomic  
36 Costs of Alzheimer's Disease and Related Dementias and Strategic Implications for Stakeholders. *J*  
37 *Alzheimers Dis.* 2019;70:323-41.  
38  
39 28. McPhail SM. Multimorbidity in chronic disease: impact on health care resources and costs. *Risk*  
40 *Manag Healthc Policy.* 2016;9:143-56.  
41  
42  
43  
44  
45  
46  
47  
48  
49  
50  
51  
52  
53  
54  
55  
56  
57  
58  
59  
60



**Table 1. Demographic and clinical characteristics at first year within each age group**

| Characteristic                    | Age 65-74y |             | Age 75-84y |             | Age 85y+ |             |
|-----------------------------------|------------|-------------|------------|-------------|----------|-------------|
|                                   | Dementia   | No dementia | Dementia   | No dementia | Dementia | No dementia |
| N                                 | 9,135      | 652,620     | 23,747     | 330,414     | 34,752   | 123,786     |
| Women                             | 50.0       | 50.2        | 56.7       | 54.3        | 66.7     | 61.5        |
| Men                               | 50.0       | 49.8        | 43.3       | 45.7        | 33.3     | 38.5        |
| Rural                             | 11.6       | 13.1        | 10.9       | 12.6        | 10.3     | 11.0        |
| Lowest SES neighbourhood quintile | 25.8       | 18.3        | 23.5       | 20.0        | 22.7     | 22.8        |
| Non-dementia morbidities          |            |             |            |             |          |             |
| None                              | 4.7        | 24.0        | 3.7        | 12.8        | 2.4      | 11.2        |
| One                               | 10.0       | 25.0        | 8.8        | 17.6        | 6.7      | 10.9        |
| Two                               | 13.4       | 20.5        | 13.1       | 20.2        | 11.8     | 16.1        |
| Three                             | 15.5       | 14.0        | 15.5       | 18.0        | 15.8     | 17.8        |
| Four or more                      | 56.3       | 16.5        | 59.0       | 31.4        | 63.3     | 44.0        |
| Alcohol misuse                    | 19.5       | 2.4         | 10.0       | 2.0         | 4.2      | 1.2         |
| Asthma                            | 6.5        | 2.7         | 5.6        | 3.5         | 5.0      | 4.0         |
| Atrial fibrillation               | 12.1       | 4.5         | 19.9       | 11.0        | 26.8     | 18.5        |
| Cancer, lymphoma                  | 1.2        | 0.6         | 1.1        | 0.8         | 1.0      | 0.9         |
| Cancer, metastatic                | 3.2        | 1.5         | 3.5        | 2.3         | 3.0      | 2.6         |
| Cancer, non-metastatic            | 5.6        | 4.5         | 7.4        | 7.1         | 7.2      | 7.1         |
| Chronic heart failure             | 20.1       | 4.9         | 27.0       | 11.7        | 35.2     | 22.3        |
| Chronic kidney disease            | 39.2       | 21.8        | 50.7       | 40.0        | 66.3     | 56.9        |
| Chronic pain                      | 18.5       | 14.7        | 17.1       | 16.8        | 15.0     | 16.0        |
| Chronic pulmonary disease         | 34.3       | 14.2        | 34.8       | 21.3        | 34.4     | 25.1        |
| Chronic viral hepatitis B         | 0.2        | 0.1         | 0.0        | 0.1         | 0.0      | 0.0         |
| Cirrhosis                         | 1.7        | 0.3         | 0.7        | 0.2         | 0.2      | 0.1         |
| Constipation, severe              | 5.1        | 0.8         | 5.6        | 1.7         | 6.7      | 3.1         |
| Depression                        | 33.6       | 7.0         | 27.1       | 6.5         | 21.2     | 6.4         |
| Diabetes                          | 32.0       | 17.8        | 30.4       | 21.6        | 25.5     | 19.9        |
| Epilepsy                          | 11.8       | 1.3         | 5.9        | 1.3         | 3.7      | 1.2         |
| Gout                              | 10.6       | 8.6         | 12.5       | 11.5        | 13.7     | 13.0        |
| Hypertension                      | 64.8       | 50.6        | 73.5       | 67.7        | 79.0     | 74.2        |
| Hypothyroidism                    | 17.9       | 11.3        | 20.8       | 15.5        | 24.8     | 19.2        |
| Inflammatory bowel disease        | 1.5        | 1.0         | 1.4        | 1.0         | 1.0      | 0.8         |
| Irritable bowel syndrome          | 4.1        | 2.0         | 3.6        | 2.1         | 3.1      | 2.0         |
| Multiple sclerosis                | 4.1        | 0.7         | 1.4        | 0.4         | 0.7      | 0.3         |
| Myocardial infarction             | 5.6        | 3.3         | 7.1        | 5.1         | 7.9      | 6.5         |
| Parkinson's disease               | 10.4       | 0.7         | 11.4       | 1.7         | 9.3      | 2.4         |
| Peptic ulcer disease              | 1.3        | 0.2         | 1.1        | 0.4         | 0.9      | 0.4         |
| Peripheral vascular disease       | 5.4        | 1.5         | 5.8        | 3.0         | 5.5      | 3.9         |
| Psoriasis                         | 1.7        | 0.8         | 1.3        | 0.9         | 1.0      | 0.8         |
| Rheumatoid arthritis              | 5.4        | 2.7         | 5.6        | 4.2         | 6.3      | 5.0         |
| Schizophrenia                     | 15.6       | 0.8         | 7.0        | 0.5         | 3.5      | 0.3         |
| Stroke or TIA                     | 31.1       | 7.1         | 35.0       | 13.7        | 38.2     | 21.1        |

N count, SES socioeconomic status, TIA transient ischemic attack

Percentages are reported. Many participants will have data within multiple age groups



| Morbidities | Participant-years <sup>1</sup> | Hospital costs<br>Mean (95%CI) | Medication costs<br>Mean (95%CI) | ACCS costs<br>Mean (95%CI) | Claim costs<br>Mean (95%CI) | LTC costs<br>Mean (95%CI) | Total costs<br>Mean (95%CI) |
|-------------|--------------------------------|--------------------------------|----------------------------------|----------------------------|-----------------------------|---------------------------|-----------------------------|
|             |                                |                                |                                  |                            |                             |                           |                             |

ACCS Ambulatory Care Classification System, CAD Canadian dollars, CI confidence interval, LTC long-term care

Costs are adjusted for sex, and rural/urban. These models include 3-way and 2-way interactions terms for dementia, age, and number of morbidity.

The Table shows the mean costs (i.e., long-term care, hospitalizations, provider claims, ACCS, medications, and total costs) that is associated with dementia. All costs are reported in \$1000 Canadian dollar units and are inflated to 2017 costs using the consumer price index for all items in Canada.

<sup>1</sup>Participant-years correspond to number of full or partial fiscal-years for each participant

Confidential



| Morbidities | Participant-years <sup>1</sup> | Hospital costs<br>Mean (95%CI) | Medication costs<br>Mean (95%CI) | ACCS costs<br>Mean (95%CI) | Claim costs<br>Mean (95%CI) | LTC costs<br>Mean (95%CI) | Total costs<br>Mean (95%CI) |
|-------------|--------------------------------|--------------------------------|----------------------------------|----------------------------|-----------------------------|---------------------------|-----------------------------|
|             |                                |                                |                                  |                            |                             |                           |                             |

ACCS Ambulatory Care Classification System, CAD Canadian dollars, CI confidence interval, LTC long-term care

Costs are adjusted for sex, and rural/urban. These models include 3-way and 2-way interactions terms for dementia, age, and number of morbidity.

The Table shows the mean costs (i.e., long-term care, hospitalizations, provider claims, ACCS, medications, and total costs) that is associated with dementia. All costs are reported in \$1000 Canadian dollar units and are inflated to 2017 costs using the consumer price index for all items in Canada.

<sup>1</sup>Participant-years correspond to number of full or partial fiscal-years for each participant

Confidential

1  
2  
3  
4  
5  
6  
7  
8  
9  
10  
11  
12  
13  
14  
15  
16  
17  
18  
19  
20  
21  
22  
23  
24  
25  
26  
27  
28  
29  
30  
31  
32  
33  
34  
35  
36  
37  
38  
39  
40  
41  
42  
43  
44  
45  
46  
47

**Figure 1. Adjusted annual mean costs (in CAD) for dementia by age and number of morbidities in participants ≥65 years**

ACCS Ambulatory Care Classification System, CAD Canadian dollars, LTC long-term care

**Figure 2. Adjusted annual mean costs (in CAD) for dementia by age and number of morbidities in participants ≥85 years**

ACCS Ambulatory Care Classification System, CAD Canadian dollars, LTC long-term care

Confidential

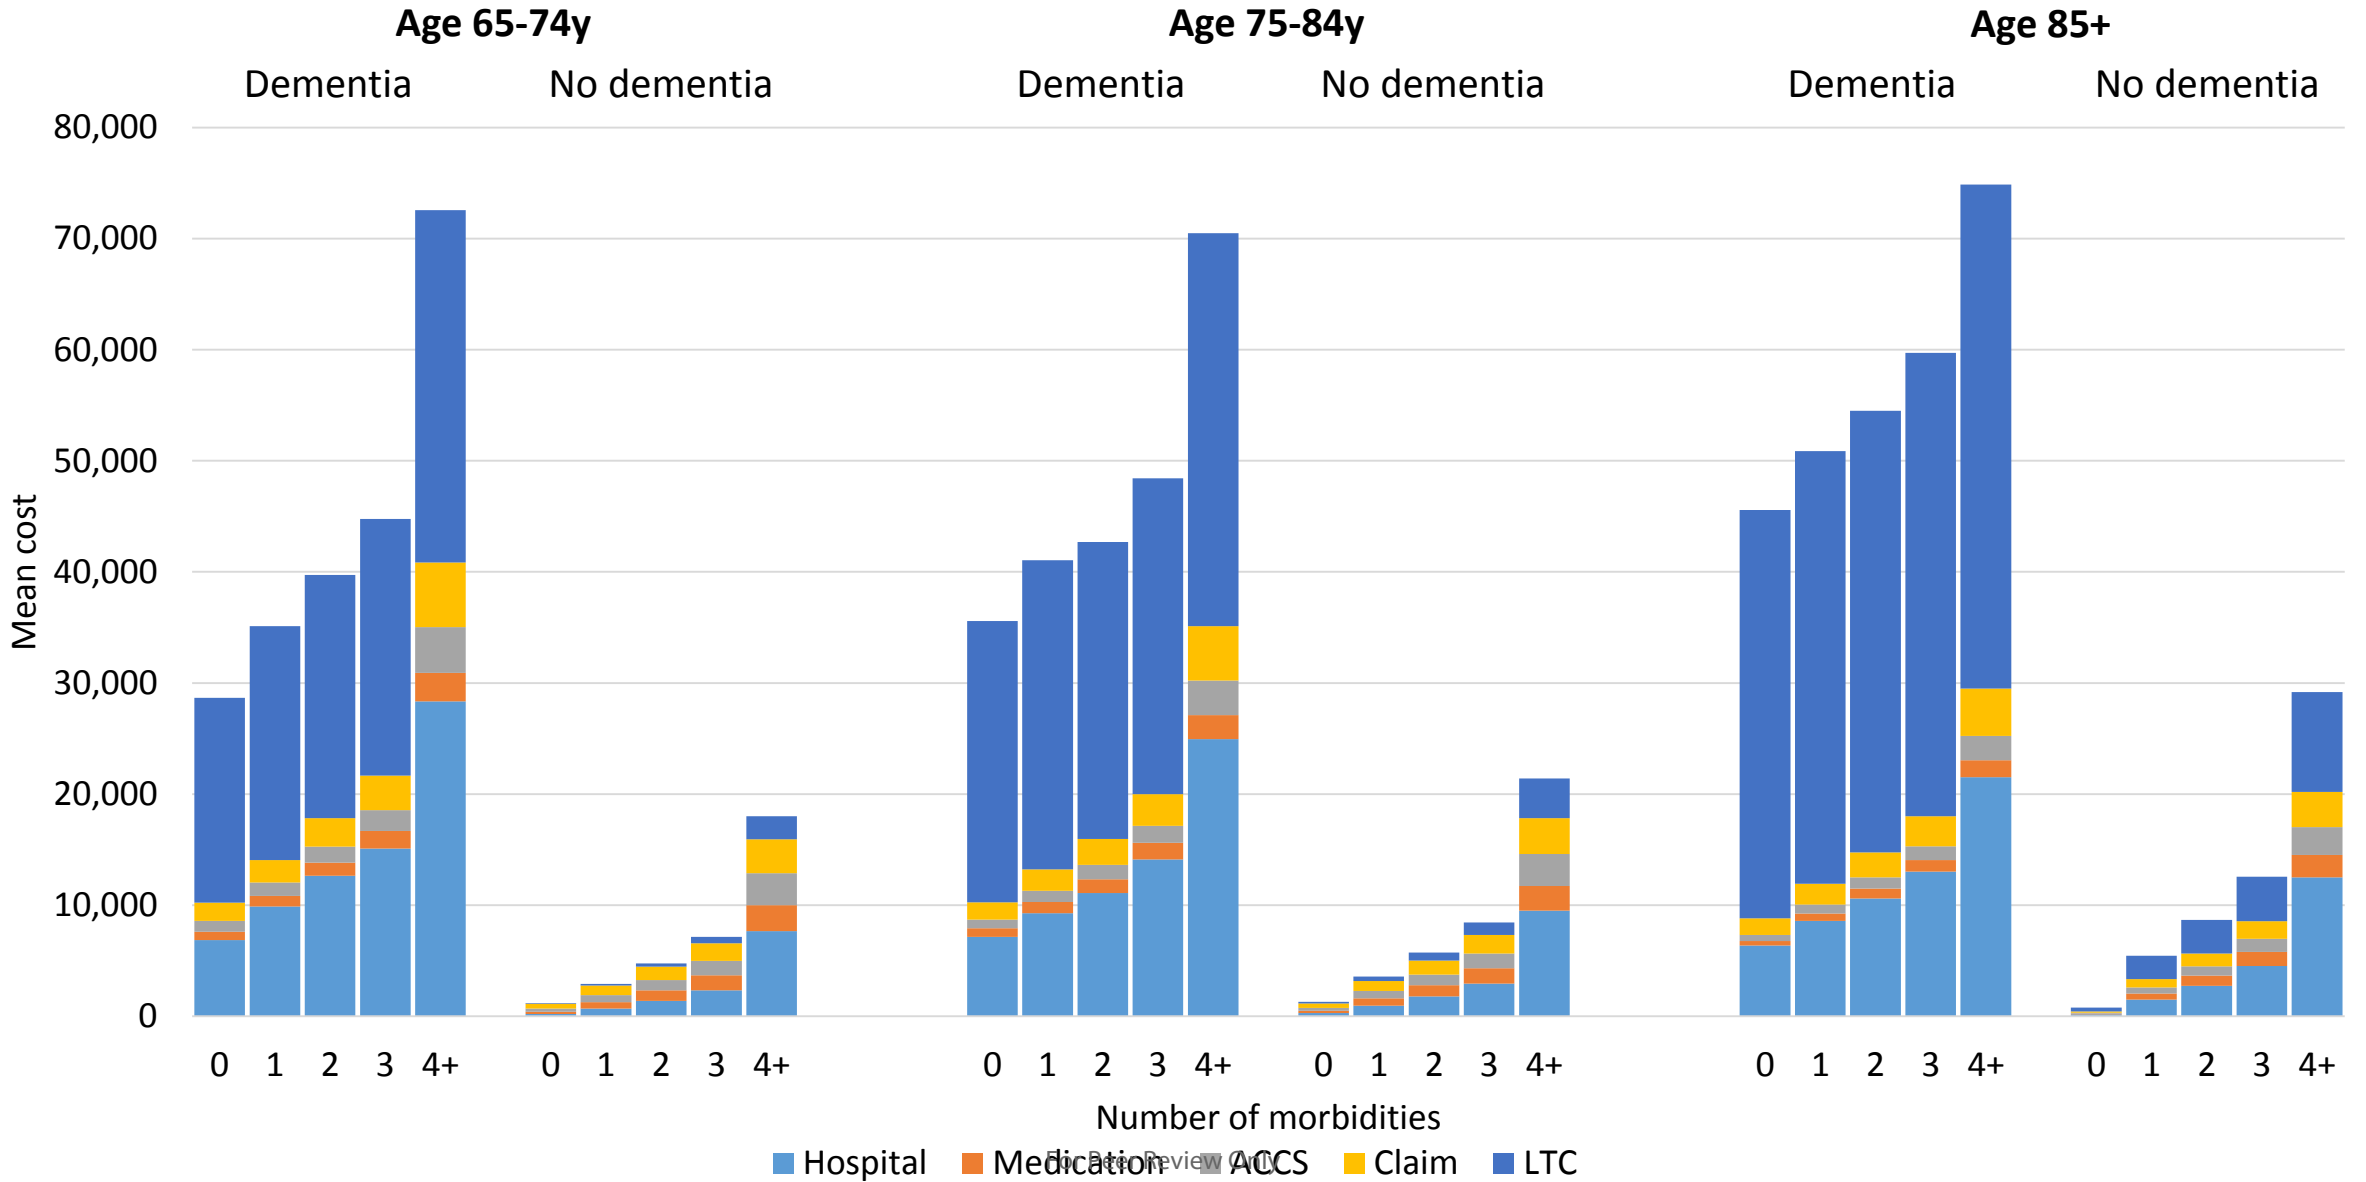

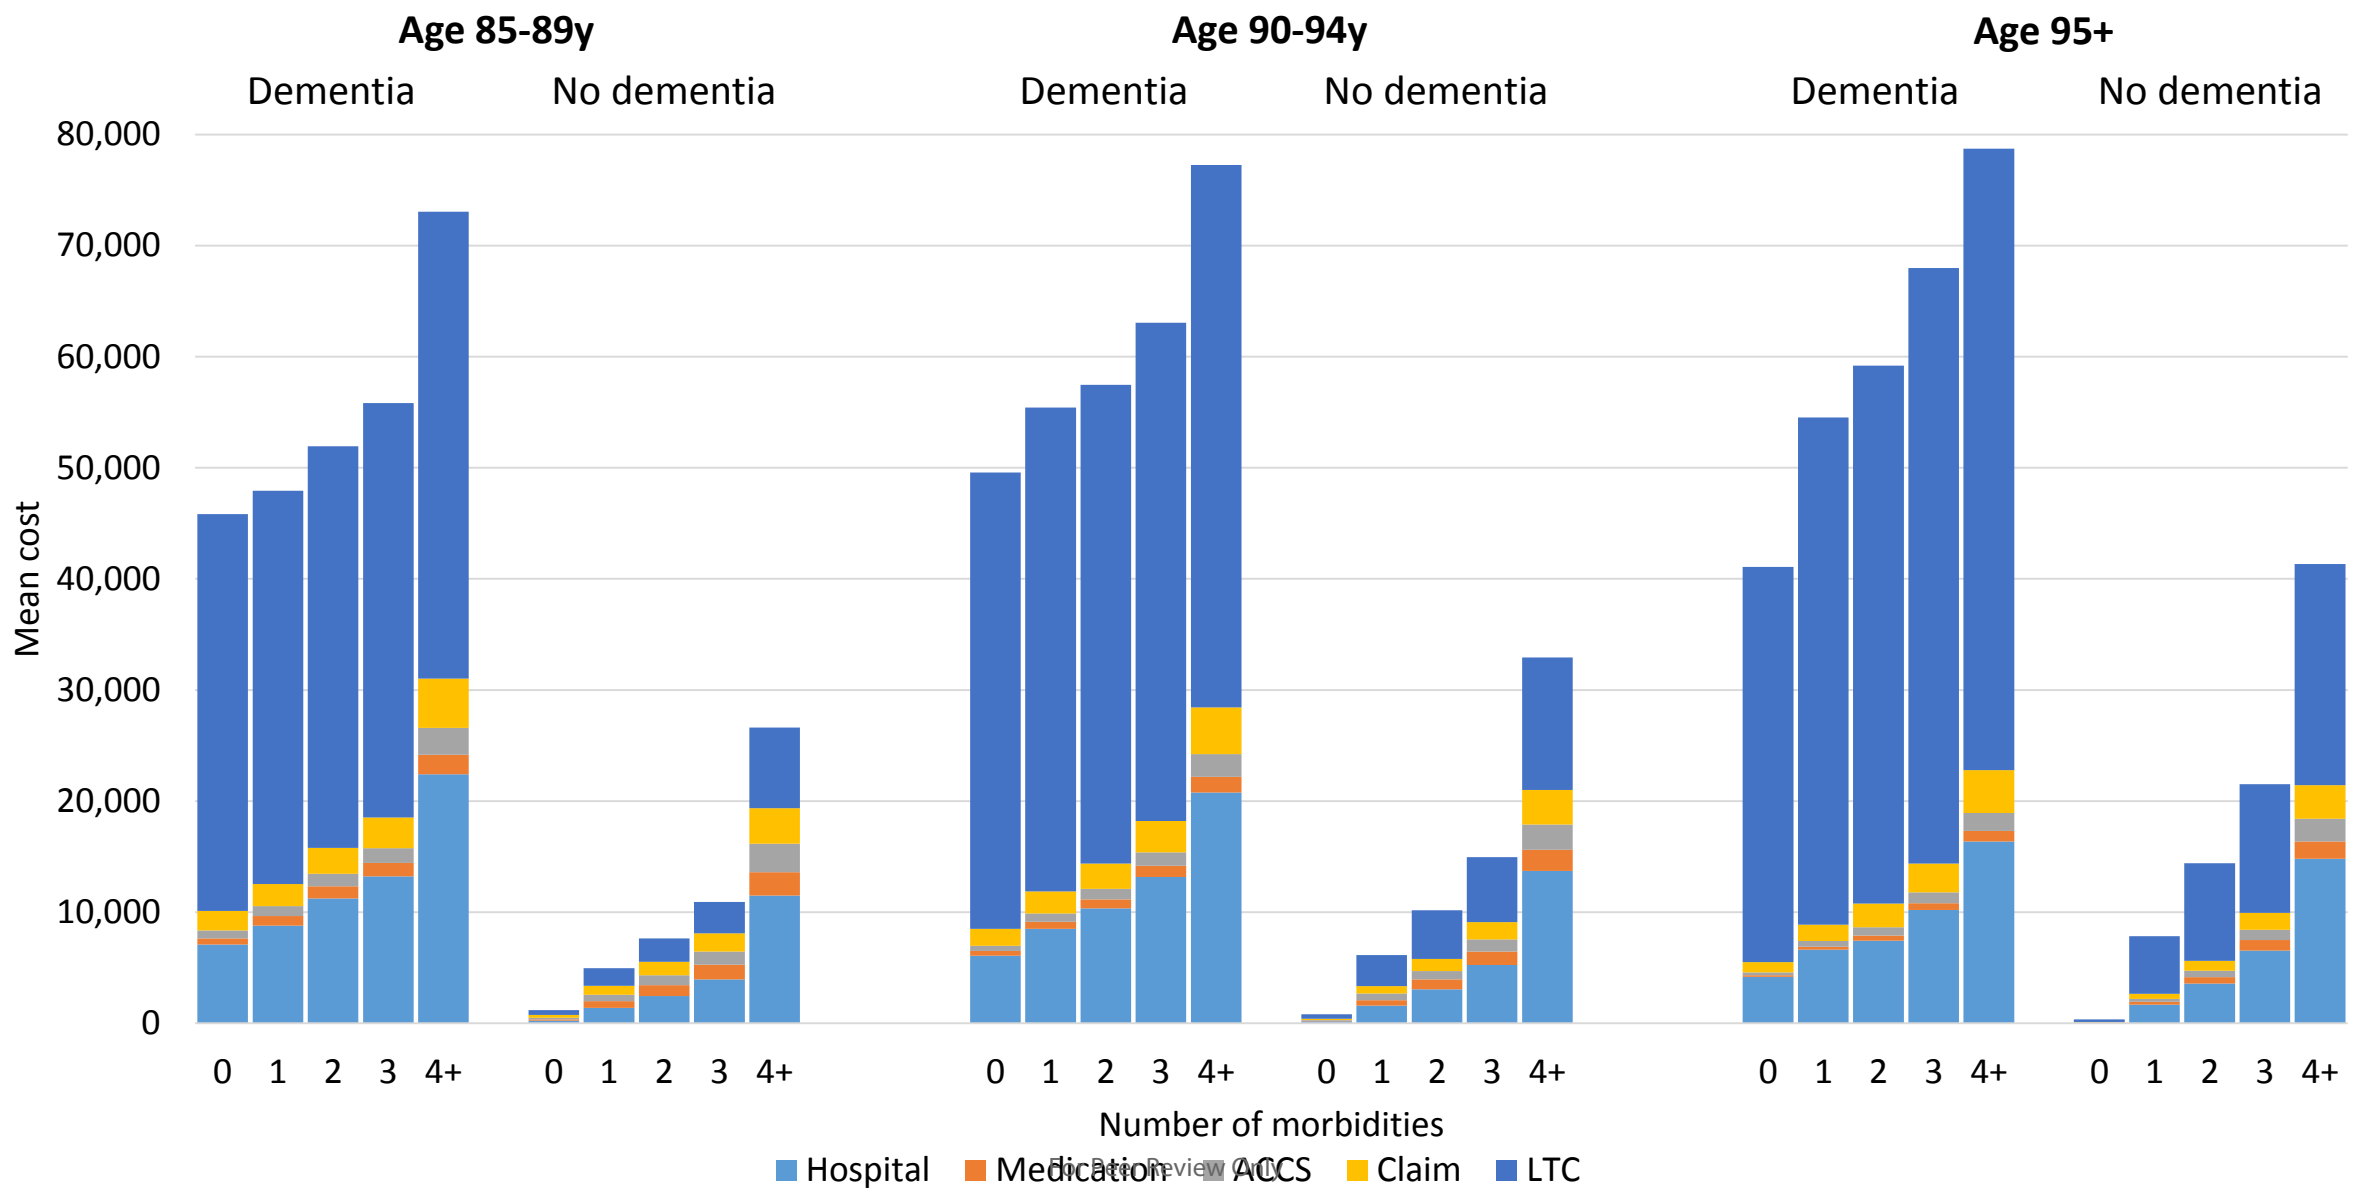

1  
2  
3  
4  
5  
6  
7  
8  
9  
10  
11  
12  
13  
14  
15  
16  
17  
18  
19  
20  
21  
22  
23  
24  
25  
26  
27  
28  
29  
30  
31  
32  
33  
34  
35  
36  
37  
38  
39  
40  
41



eFigure 1. Participant flow diagram

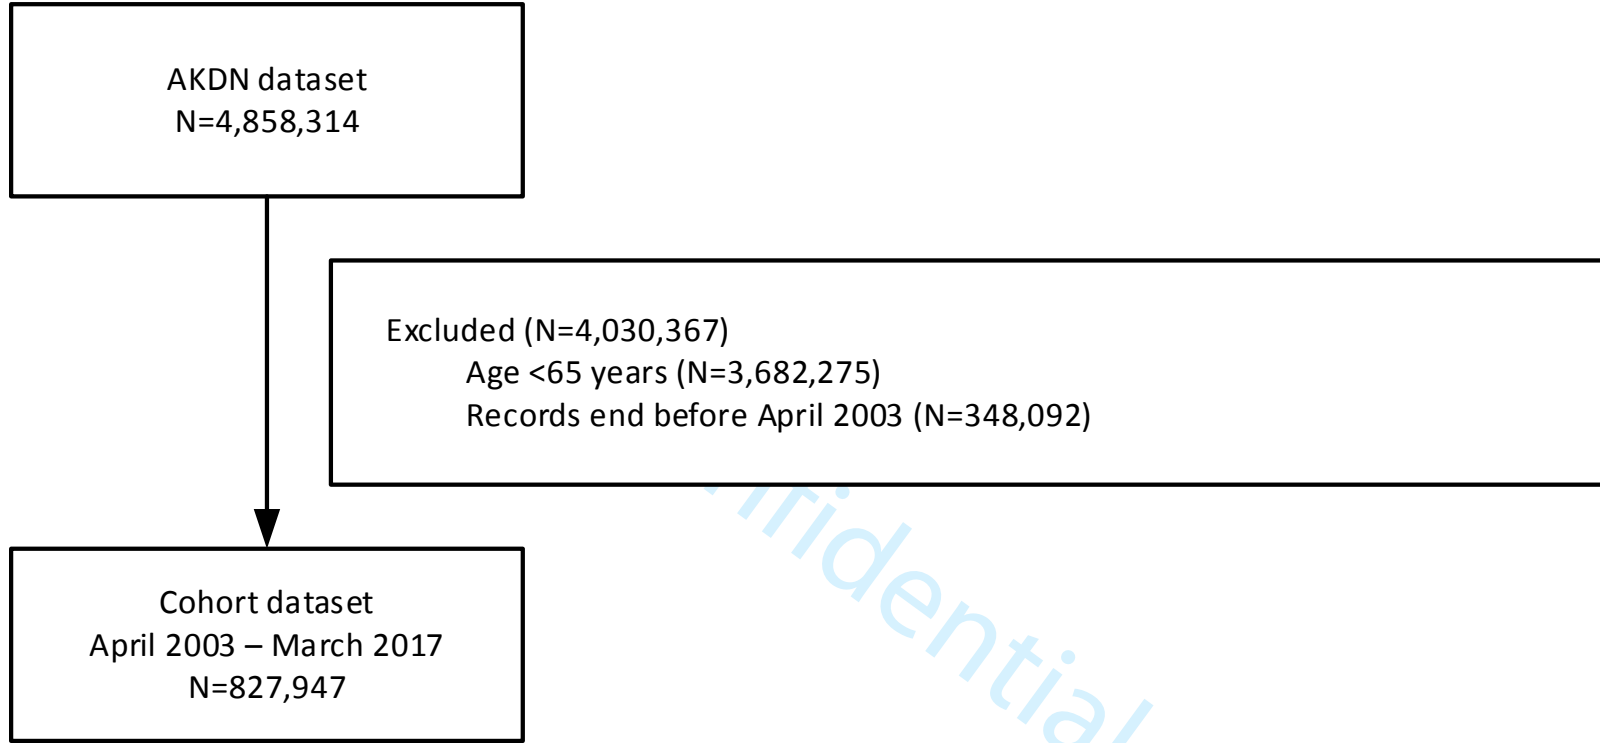

AKDN Alberta Kidney Disease Network

1  
2  
3  
4  
5  
6  
7  
8  
9  
10  
11  
12  
13  
14  
15  
16  
17  
18  
19  
20  
21  
22  
23  
24  
25  
26  
27  
28  
29  
30  
31  
32  
33  
34  
35  
36  
37  
38  
39  
40  
41  
42  
43  
44  
45  
46  
47

**eFigure 2. Adjusted annual mean costs (in CAD) for dementia by age and number of morbidities in participants ≥65 years, excluding costs of long-term care**

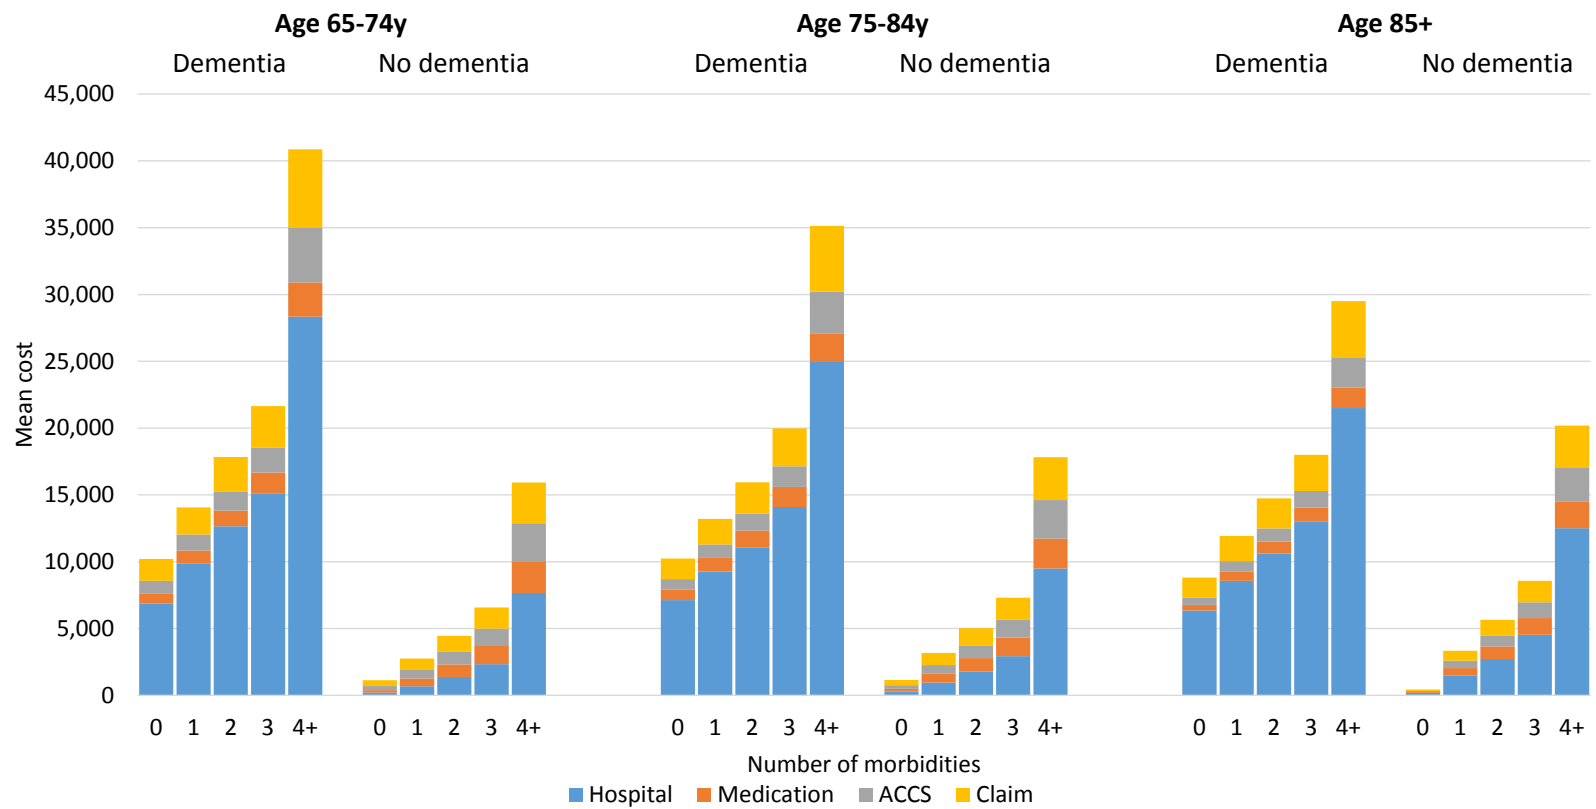

ACCS Ambulatory Care Classification System, CAD Canadian dollars, LTC long-term care

**eFigure 3. Adjusted annual mean costs (in CAD) for dementia by age and number of morbidities in participants ≥85 years, excluding costs of long-term care**

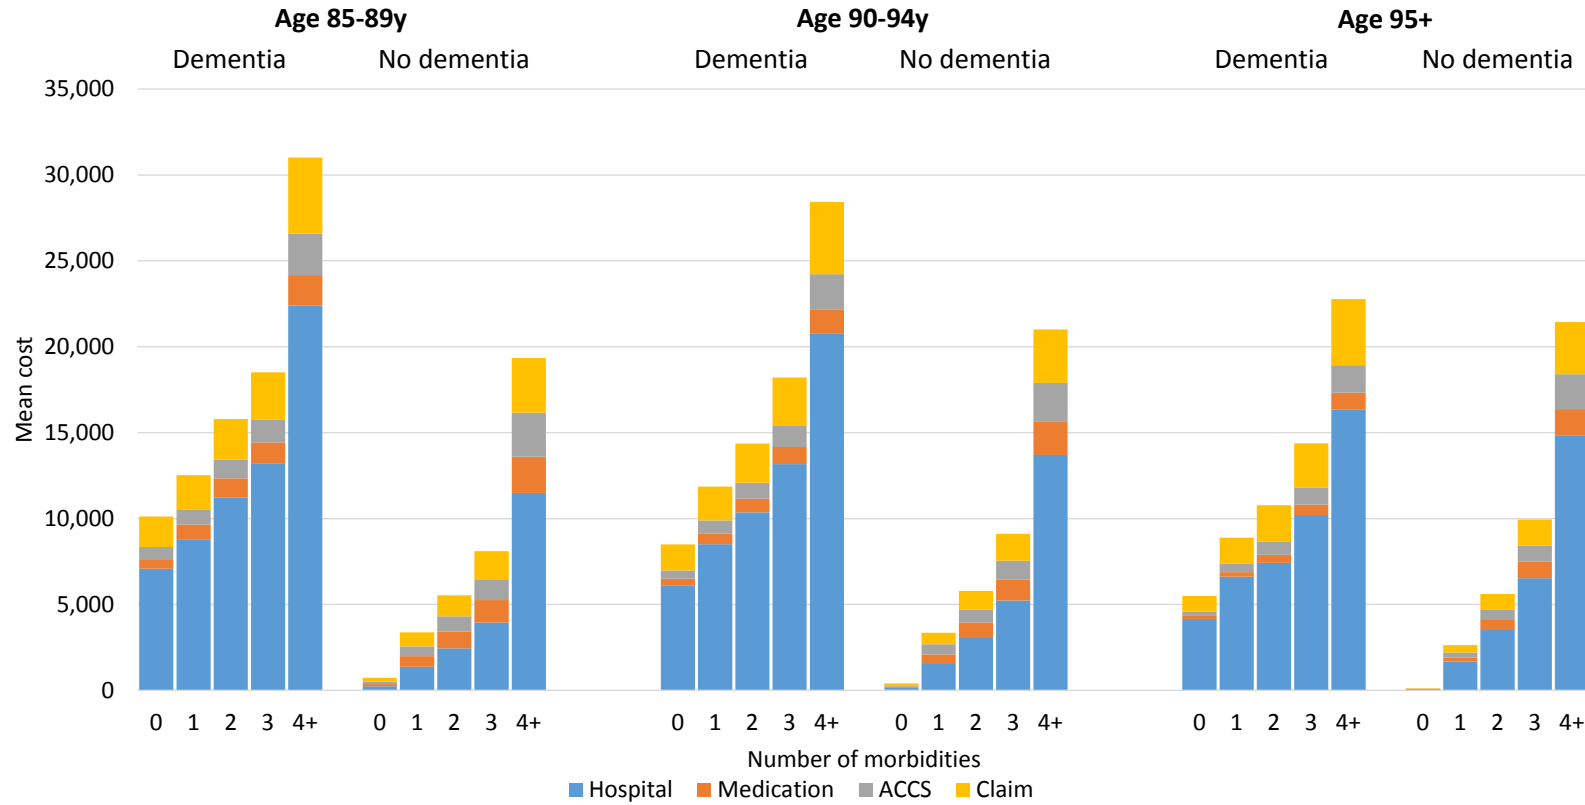

ACCs Ambulatory Care Classification System, CAD Canadian dollars, LTC long-term care
